# Supplementary material for: Cyclopeptide Derivatives from the Sponge-Derived Fungus Acremonium persicinum F10
Source: MDPI journal article supplement (doi:10.3390/md19100537), 2021-09-24
Supplement: s1 [file s1]

## **Supplementary Materials**

### **Cyclopeptide Derivatives from the Sponge-Derived Fungus**

#### ***Acremonium persicinum* F10**

Yingxin Li, Zhiyong Li\*

Marine Biotechnology Laboratory, State Key Laboratory of Microbial Metabolism  
and School of Life Sciences and Biotechnology, Shanghai Jiao Tong University, 800  
Dongchuan Road, Minhang Shanghai 200240, People's Republic of China.

\*Corresponding author: Zhiyong Li

E-mail: zyli@sjtu.edu.cn

Tel: 86- 21- 34204036

Fax: 86- 21- 34204036

## CONTENTS

|                                                                                                                                          |    |
|------------------------------------------------------------------------------------------------------------------------------------------|----|
| <b>Table S1.</b> Antifungal activities of acremonpeptide E, acremonpeptides F and their chelates (1-8) .....                             | 3  |
| <b>Figure S1.</b> Chemical structures of the previously reported derivatives of ASP2397 isolated from <i>Acremonium persicinum</i> ..... | 4  |
| <b>Figure S2.</b> Elemental analysis of compound 1 by X-ray fluorescence (XRF).....                                                      | 4  |
| <b>Figure S3-13.</b> NMR, HRESIMS, UV, and IR spectra of compound 1.....                                                                 | 5  |
| <b>Figure S14-24.</b> NMR, HRESIMS, UV, and IR spectra of compound 2.....                                                                | 10 |
| <b>Figure S25-30.</b> NMR, HRESIMS, UV, and IR spectra of compound 3.....                                                                | 16 |
| <b>Figure S31-41.</b> NMR, HRESIMS, UV, and IR spectra of compound 4.....                                                                | 19 |
| <b>Figure S42-50.</b> NMR, HRESIMS, UV, and IR spectra of compound 5.....                                                                | 24 |
| <b>Figure S51-53.</b> HRESIMS, UV, and IR spectra of compound 6.....                                                                     | 29 |
| <b>Figure S54-62.</b> NMR, HRESIMS, UV, and IR spectra of compound 7.....                                                                | 30 |
| <b>Figure S63-71.</b> NMR, HRESIMS, UV, and IR spectra of compound 8.....                                                                | 35 |
| <b>Figure S72-81.</b> NMR, HRESIMS, UV, and IR spectra of compound 9.....                                                                | 39 |

**Table S1.** Antifungal activities of acremonpeptide E, acremonpeptides F and their chelates (1–8)

| Strains                        | Compounds/MIC (μM) |      |       |      |     |       |     |     | Amphotericin B |
|--------------------------------|--------------------|------|-------|------|-----|-------|-----|-----|----------------|
|                                | 1                  | 2    | 3     | 4    | 5   | 6     | 7   | 8   |                |
| <i>A. fumigatus</i> ATCC204305 | 1.0                | 10.0 | >30.0 | 10.0 | 1.0 | >30.0 | 1.0 | 1.0 | 1.0            |
| <i>A. niger</i> ATCC16404      | 3.0                | 30.0 | >30.0 | 30.0 | 3.0 | >30.0 | 1.0 | 3.0 | 1.0            |

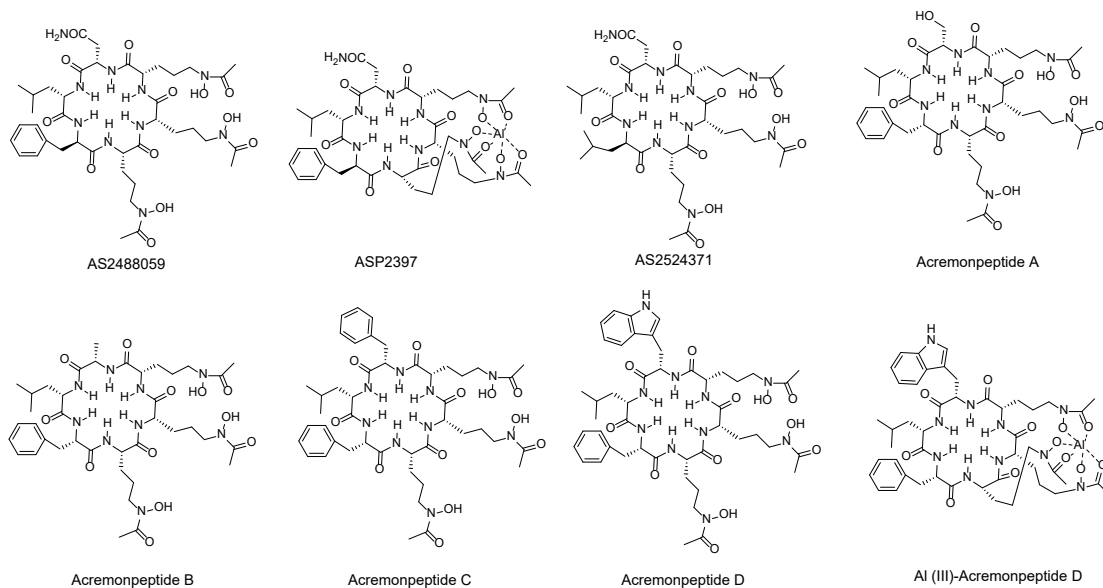

**Figure S1.** Chemical structures of the previously reported derivatives of ASP2397 isolated from *Acremonium persicinum*

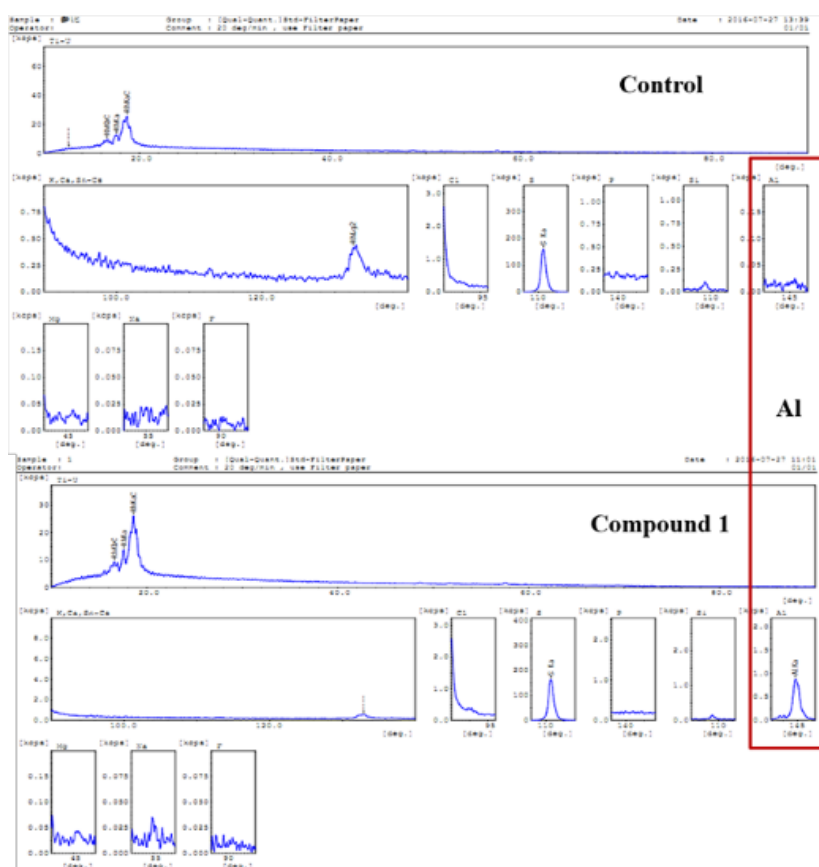

**Figure S2.** Elemental analysis of compound 1 by X-ray fluorescence (XRF).

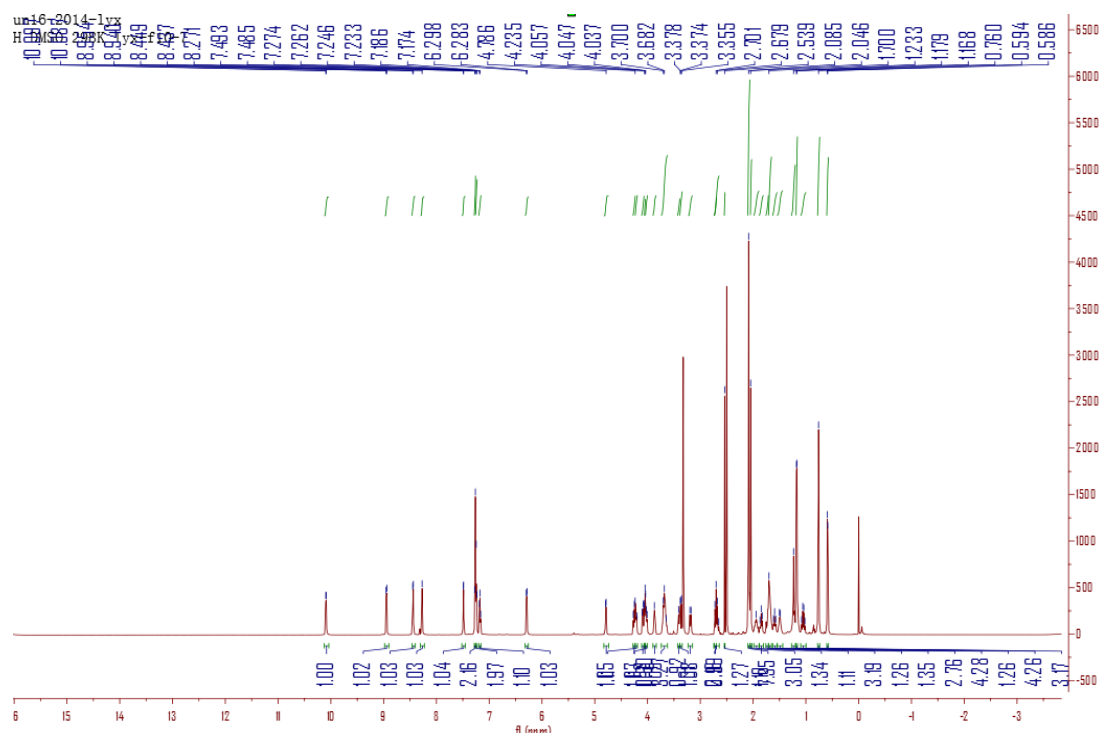

**Figure S3.**  $^1\text{H}$  spectrum of Al (III)-acremoneptide E (**1**) in  $\text{DMSO-}d_6$  (600 MHz).

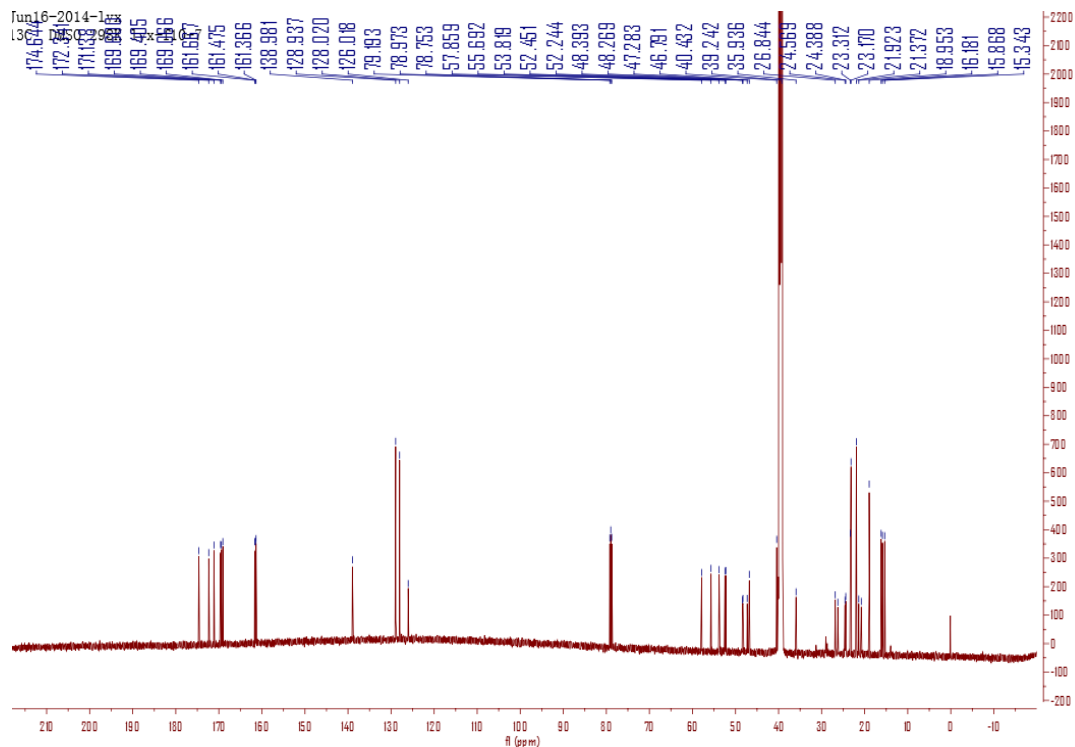

**Figure S4.**  $^{13}\text{C}$  spectrum of Al (III)-acremoneptide E (**1**) in  $\text{DMSO-}d_6$  (150 MHz).

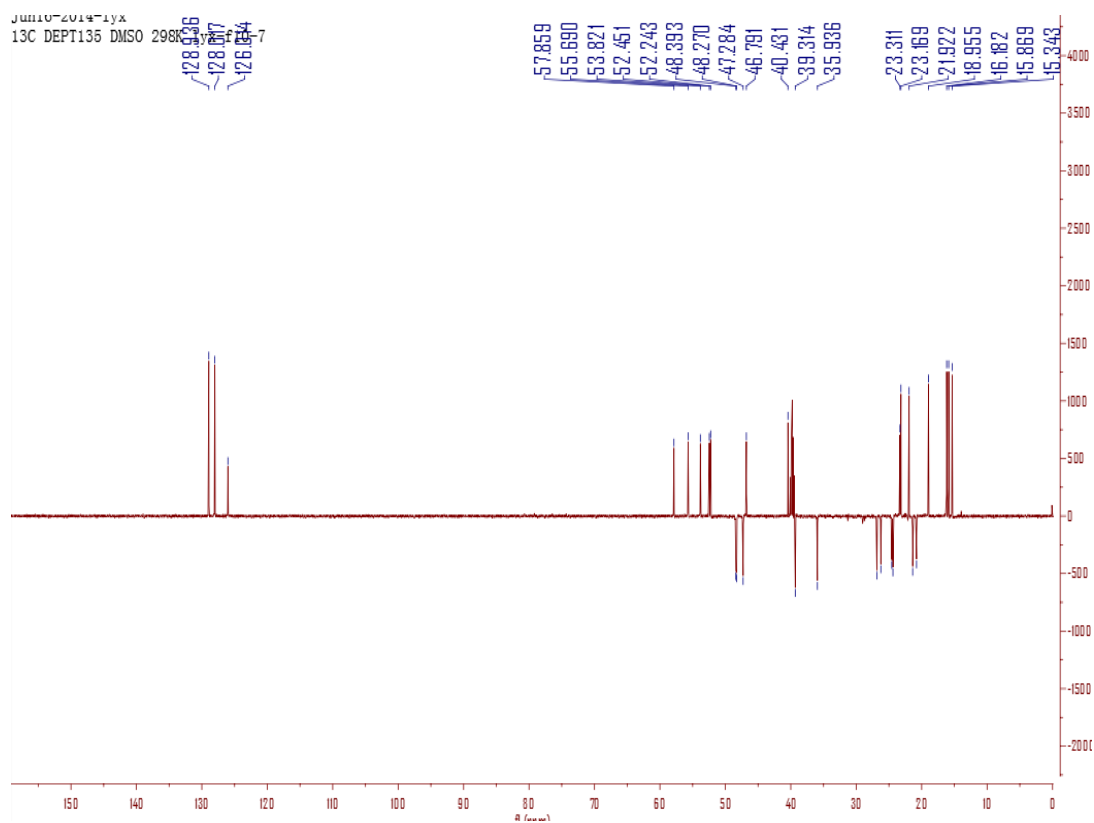

**Figure S5.** DEPT135 spectrum of Al (III)-acremoneptide E (**1**) in DMSO- $d_6$  (150 MHz).

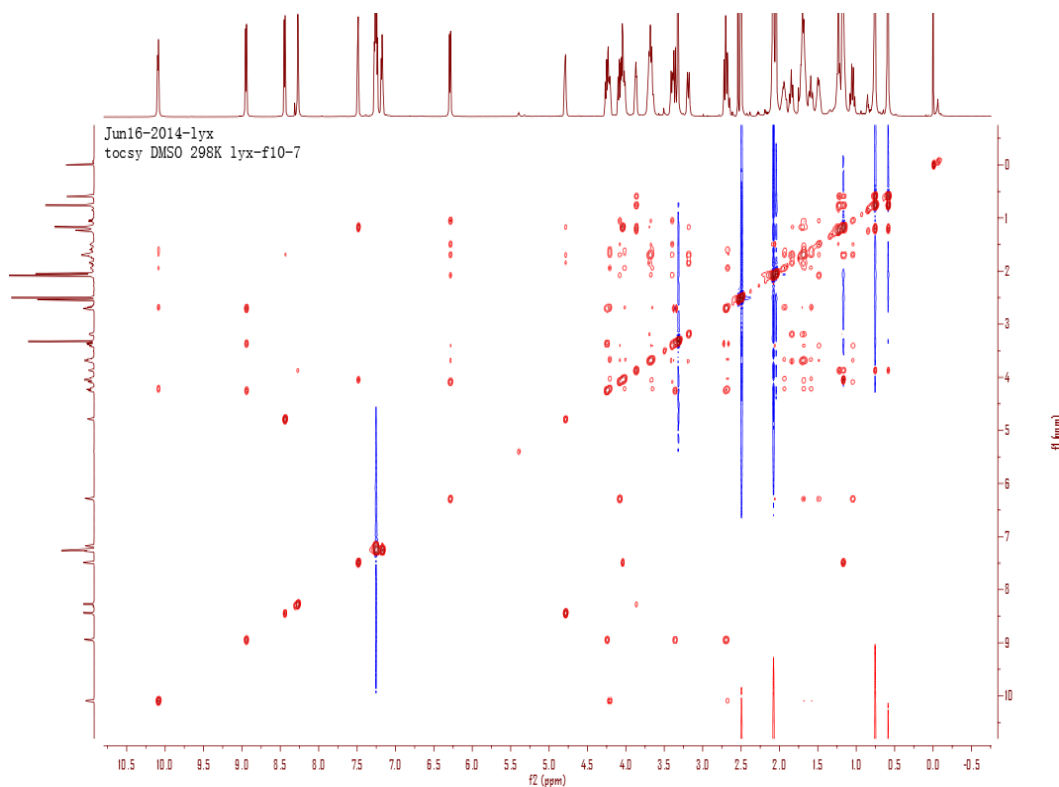

**Figure S6.** TOCSY spectrum of Al (III)-acremoneptide E (**1**) in DMSO- $d_6$

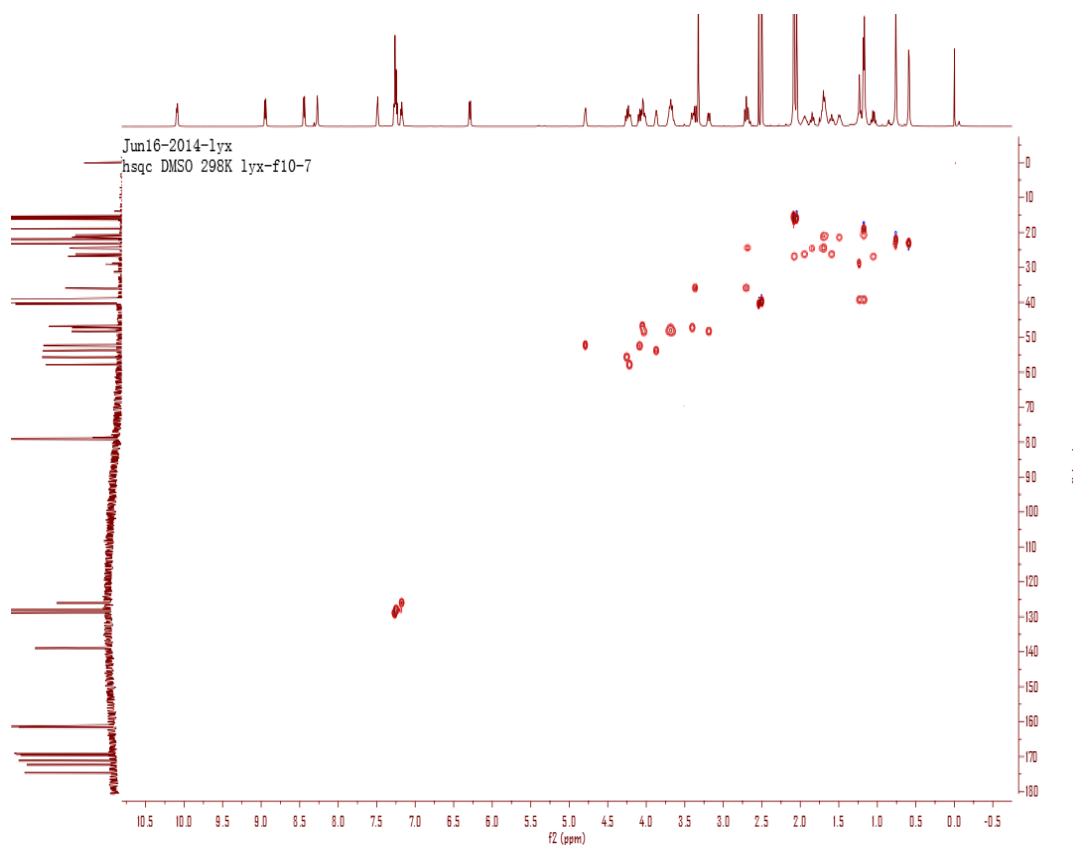

**Figure S7.** HSQC spectrum of Al (III)-acremoneptide E (**1**) in DMSO-*d*<sub>6</sub>

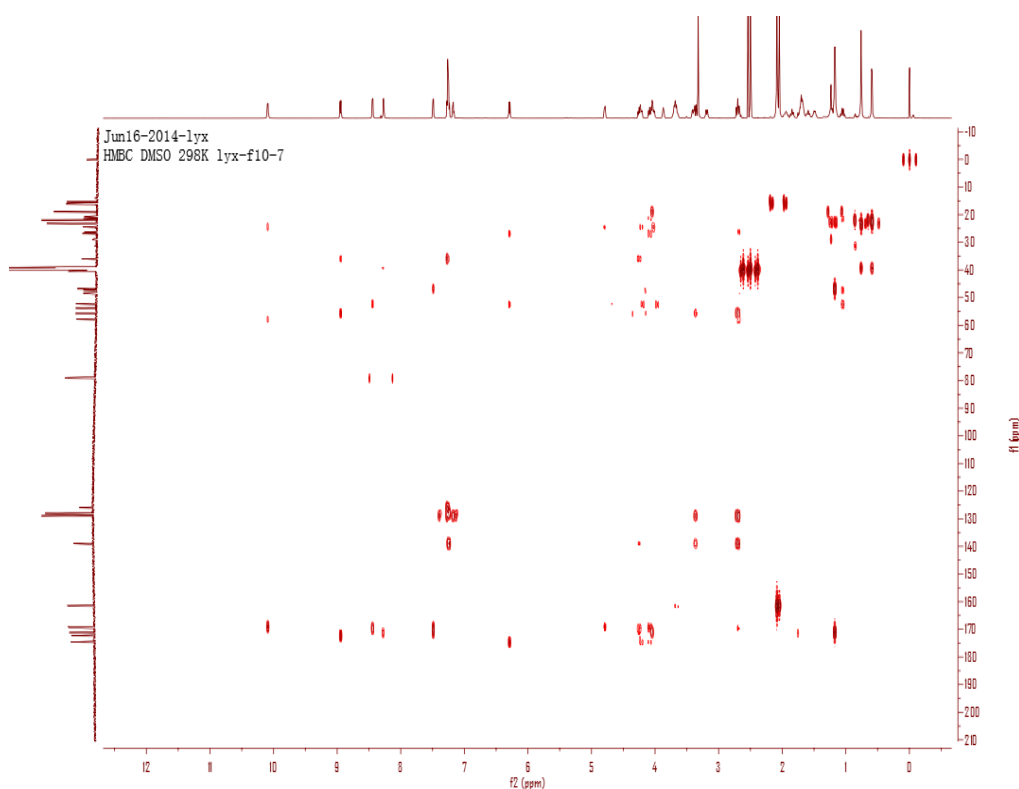

**Figure S8.** HMBC spectrum of Al (III)-acremoneptide E (**1**) in DMSO-*d*<sub>6</sub>

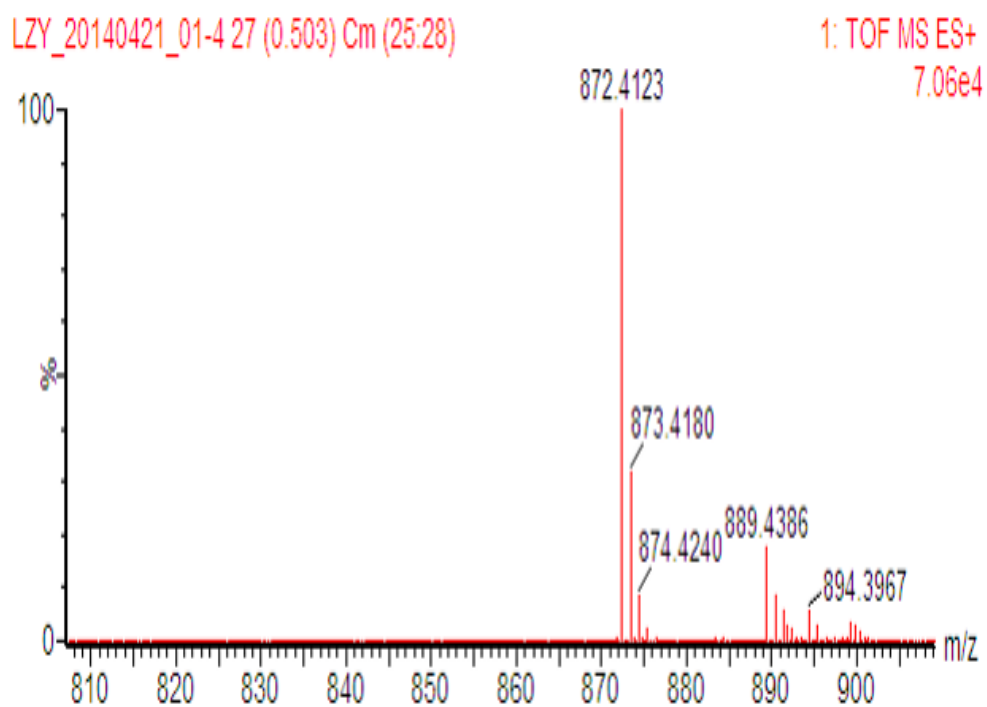

**Figure S9.** HRESIMS data of Al (III)-acremoneptide E (**1**)

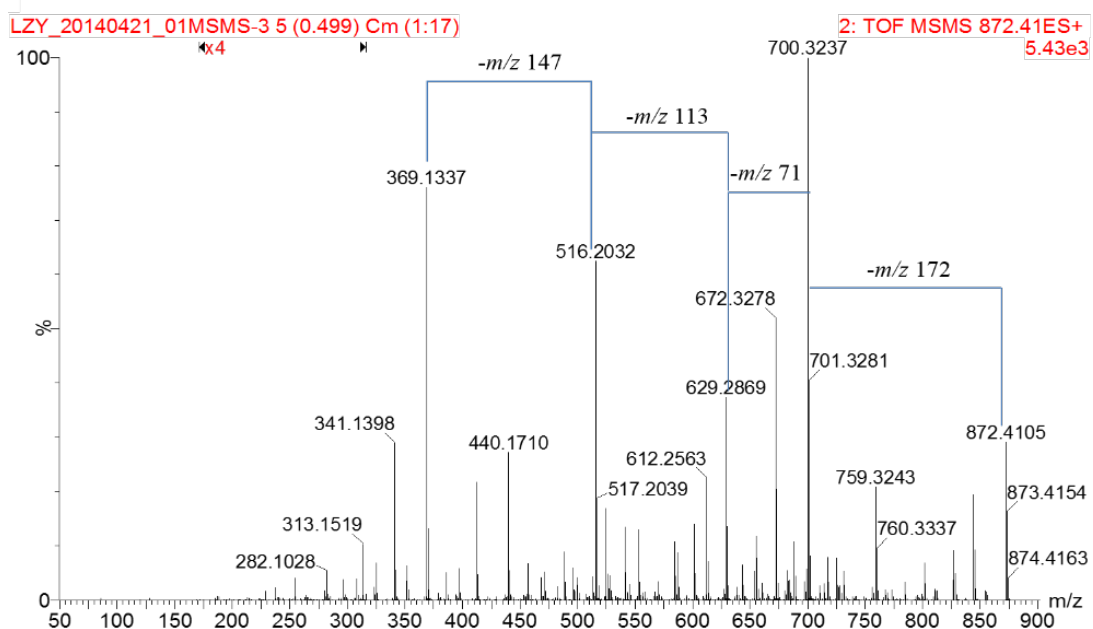

**Figure S10.** HRESIMS/MS fragmentation ions of Al (III)-acremoneptide E (**1**)



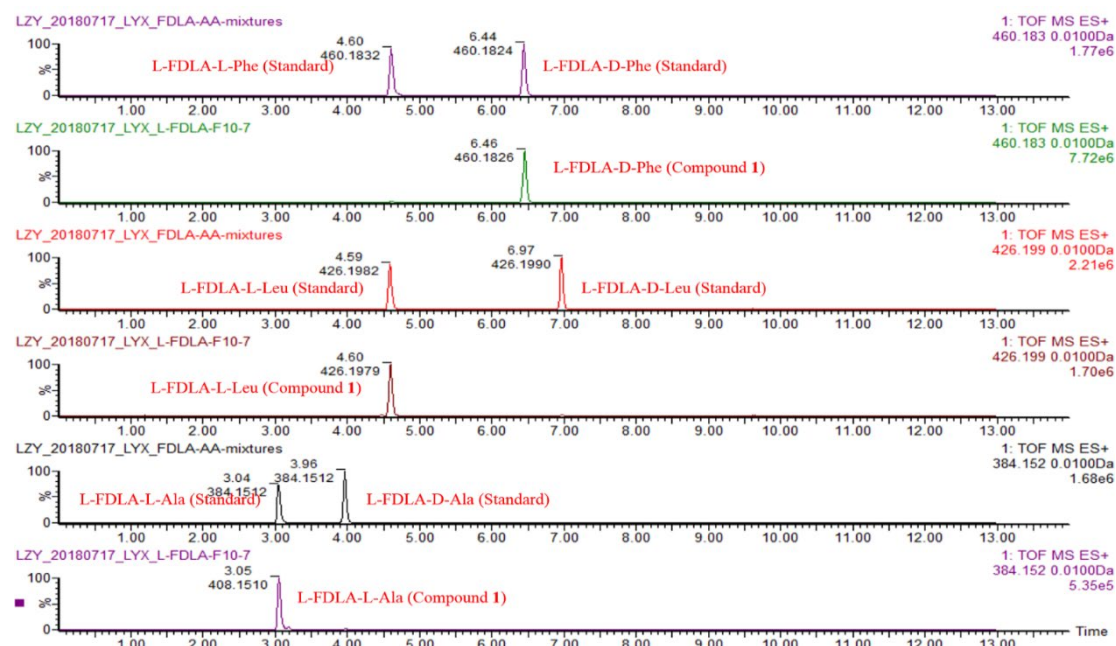

**Figure S11.** Mass chromatograms of the L-FDLA derivatives of standard amino acids and amino acids from Al (III)-acremoneptide E (1)

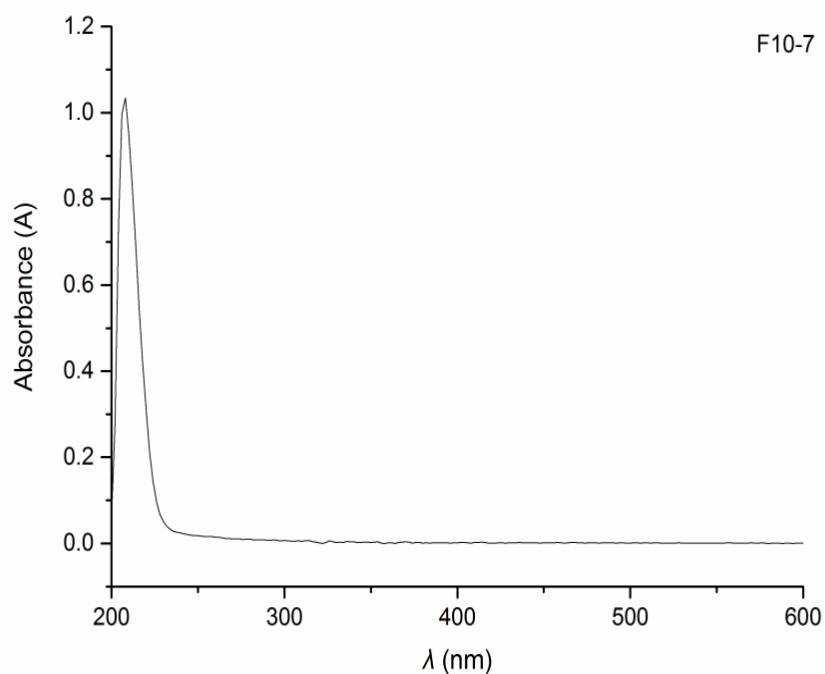

**Figure S12.** UV spectrum of Al (III)-acremoneptide E (1) in MeOH.

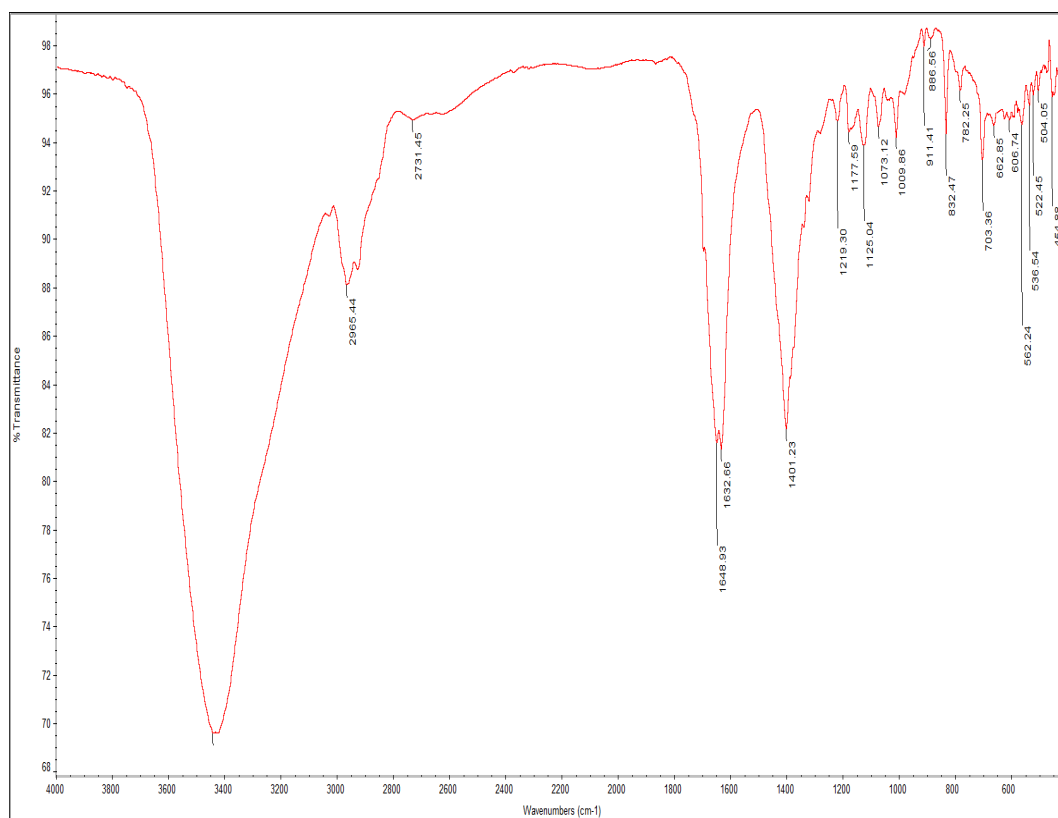

**Figure S13.** IR spectrum of Al (III)-acremoneptide E (1).

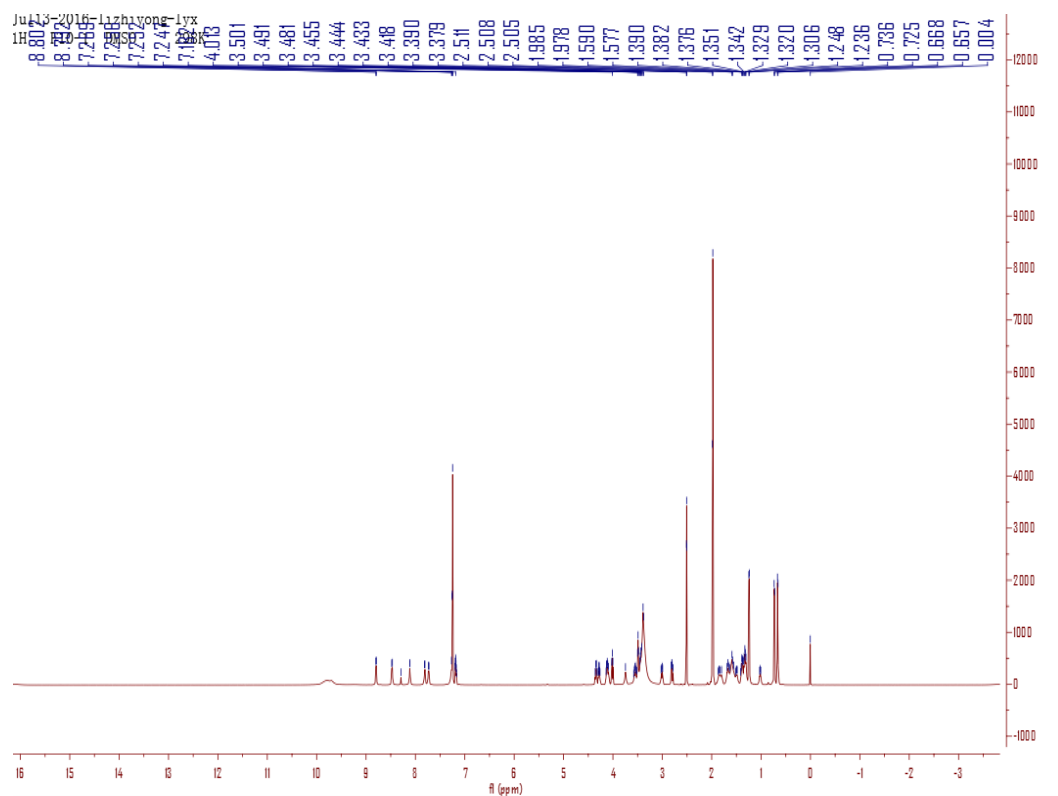

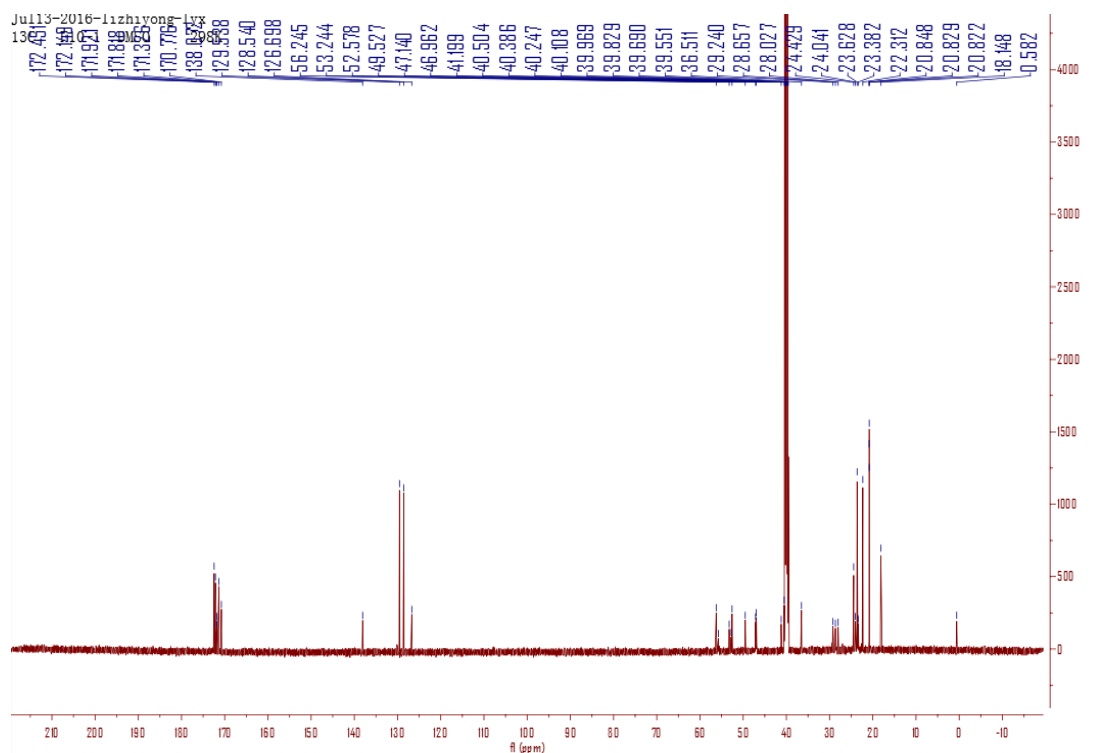

**Figure S15.**  $^{13}\text{C}$  spectrum of acremoneptide E (**2**) in  $\text{DMSO-}d_6$  (150 MHz).

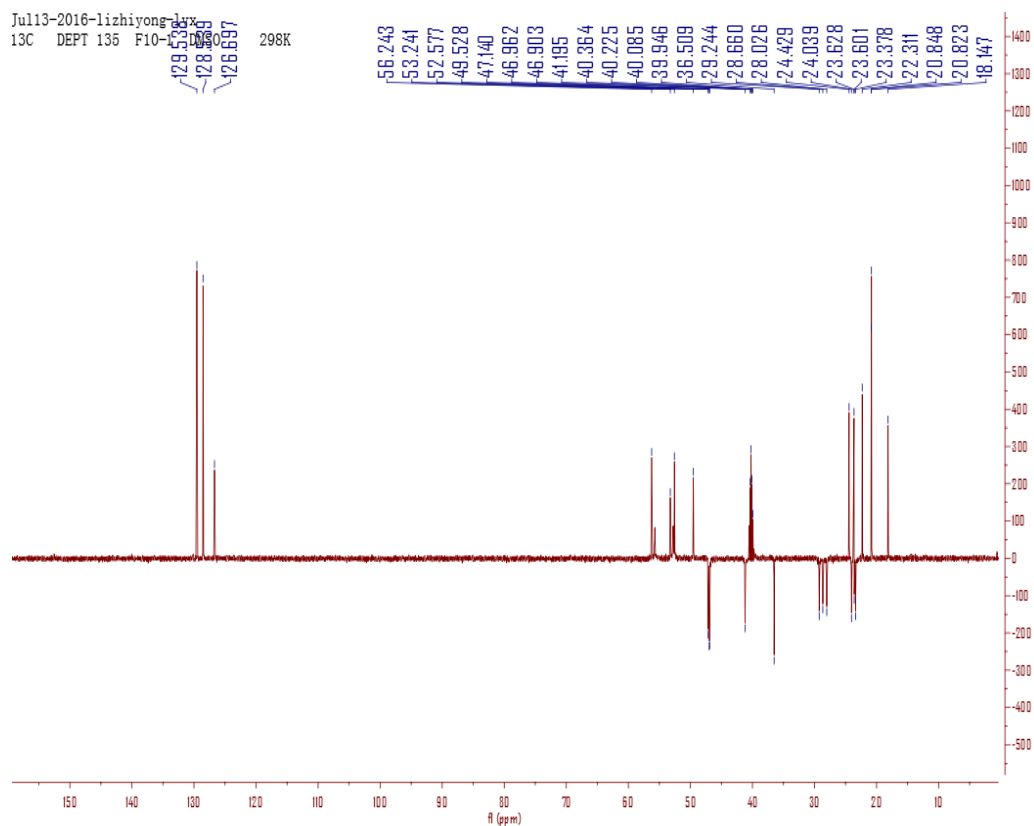

**Figure S16.** DEPT135 spectrum of acremoneptide E (**2**) in  $\text{DMSO-}d_6$  (150 MHz).

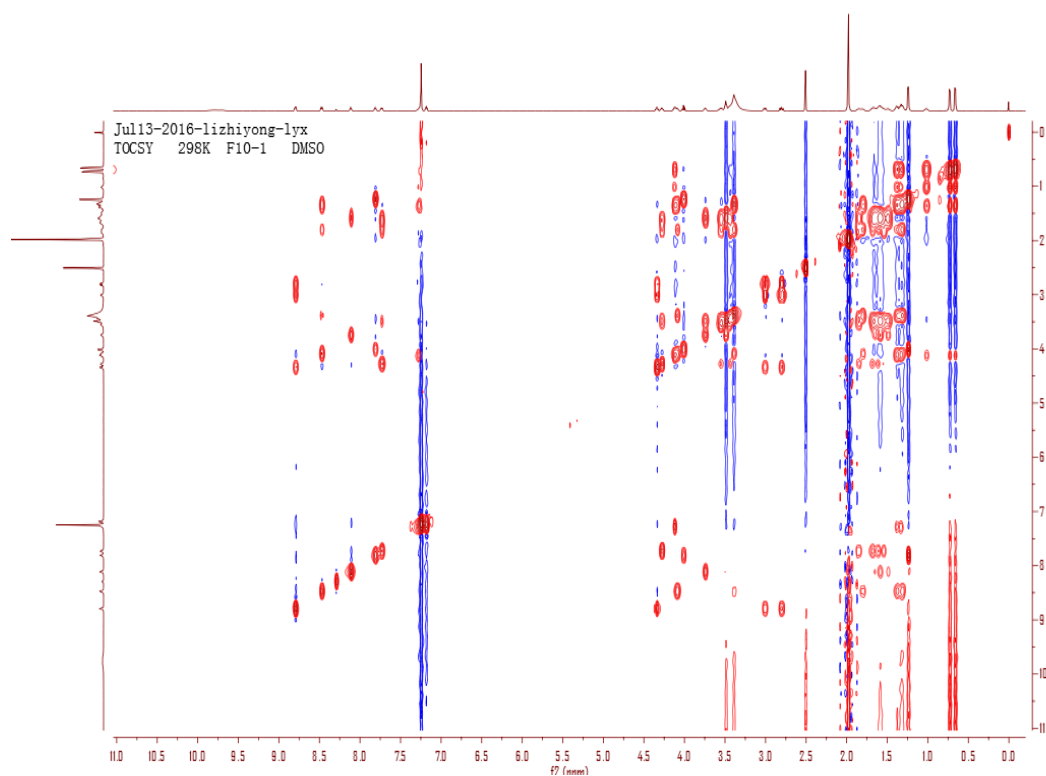

**Figure S17.** TOCSY spectrum of acremonpeptide E (**2**) in DMSO-*d*<sub>6</sub>.

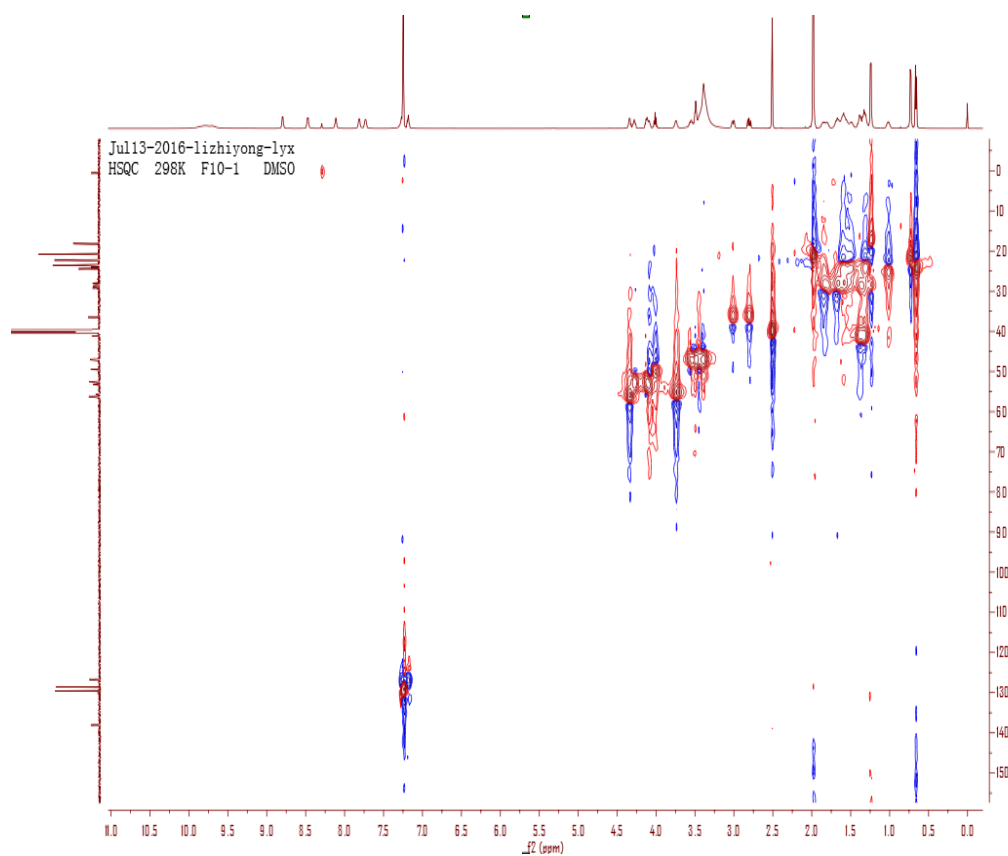

**Figure S18.** HSQC spectrum of acremonpeptide E (**2**) in DMSO-*d*<sub>6</sub>.

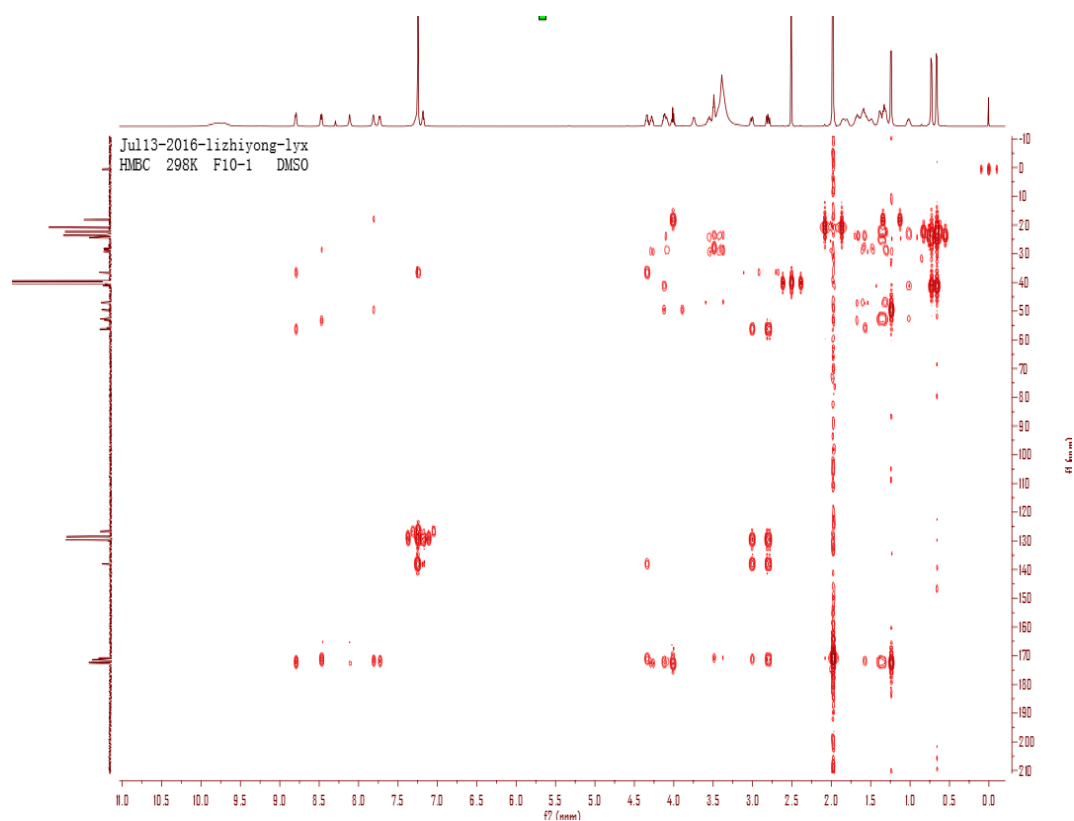

**Figure S19.** HMBC spectrum of acremoneptide E (**2**) in DMSO- $d_6$ .

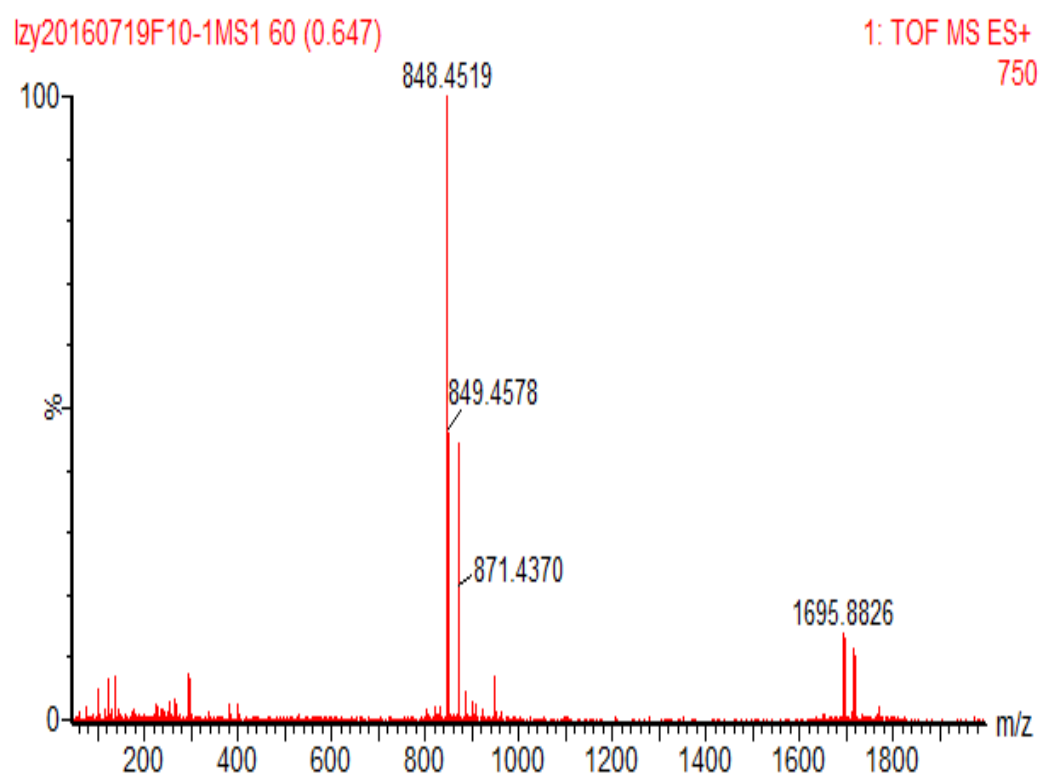

**Figure S20.** HRESIMS data of acremoneptide E (**2**).

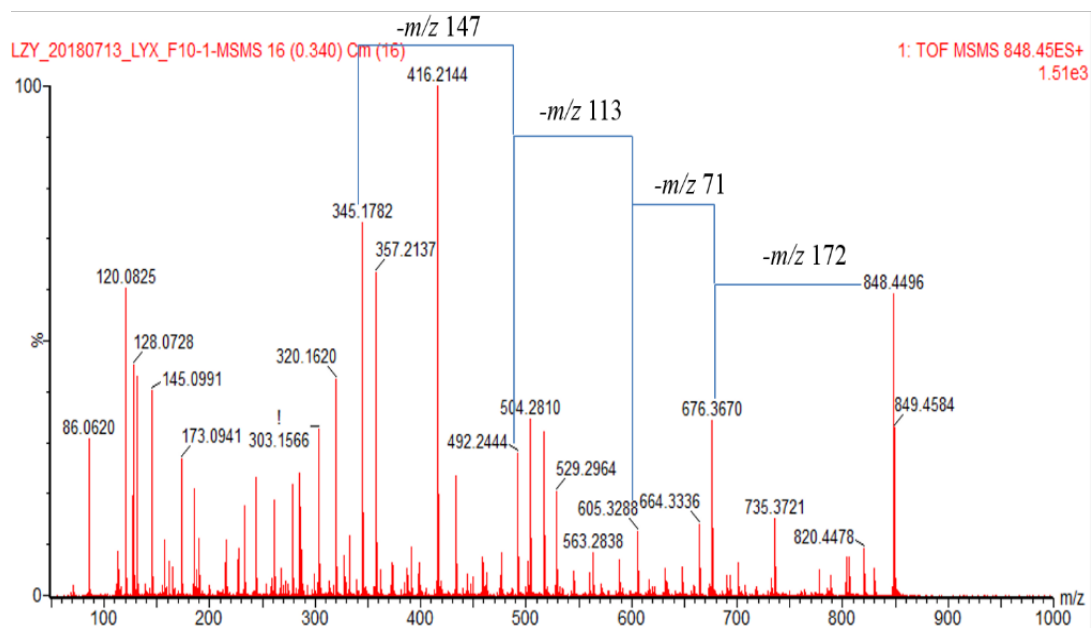

**Figure S21.** HRESIMS/MS fragmentation ions of acromonpeptide E (2)

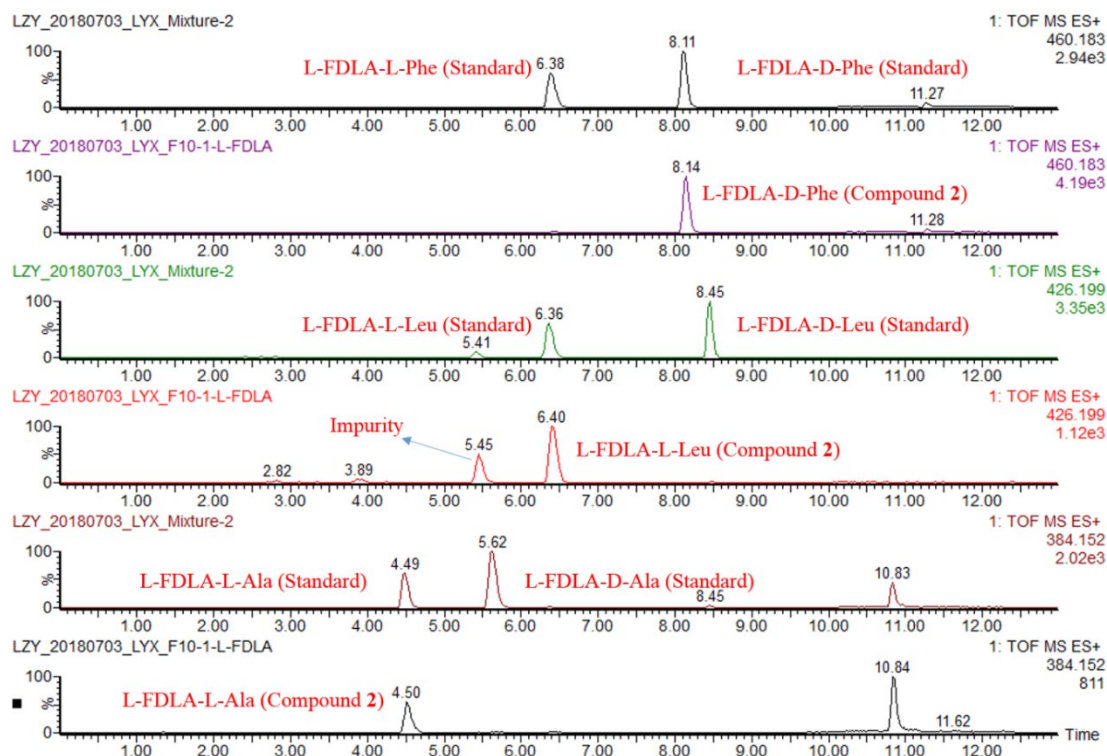

**Figure S22.** Mass chromatograms of the L-FDLA derivatives of standard amino acids and amino acids from acromonpeptide E (2)

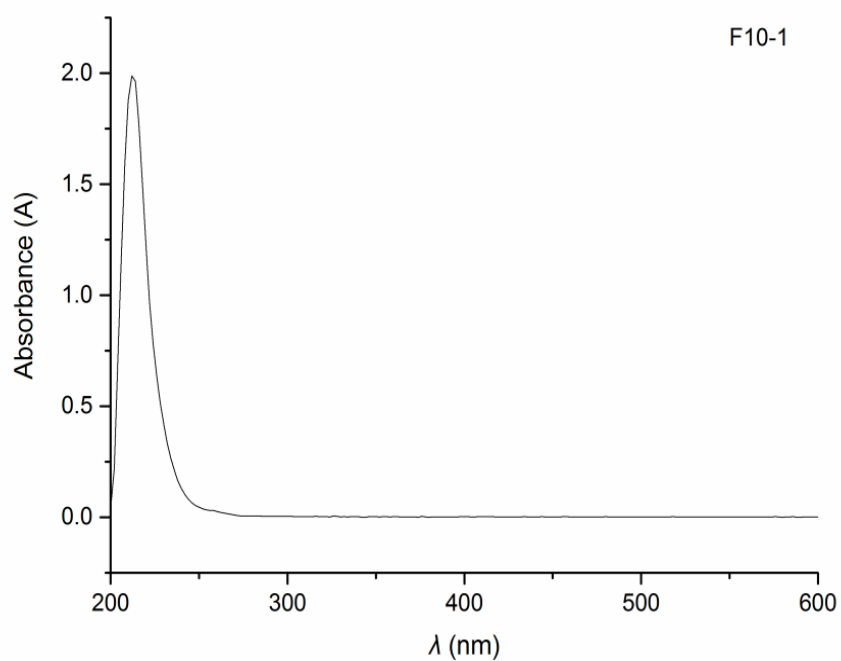

**Figure S23.** UV spectrum of acremoneptide E (2) in MeOH.

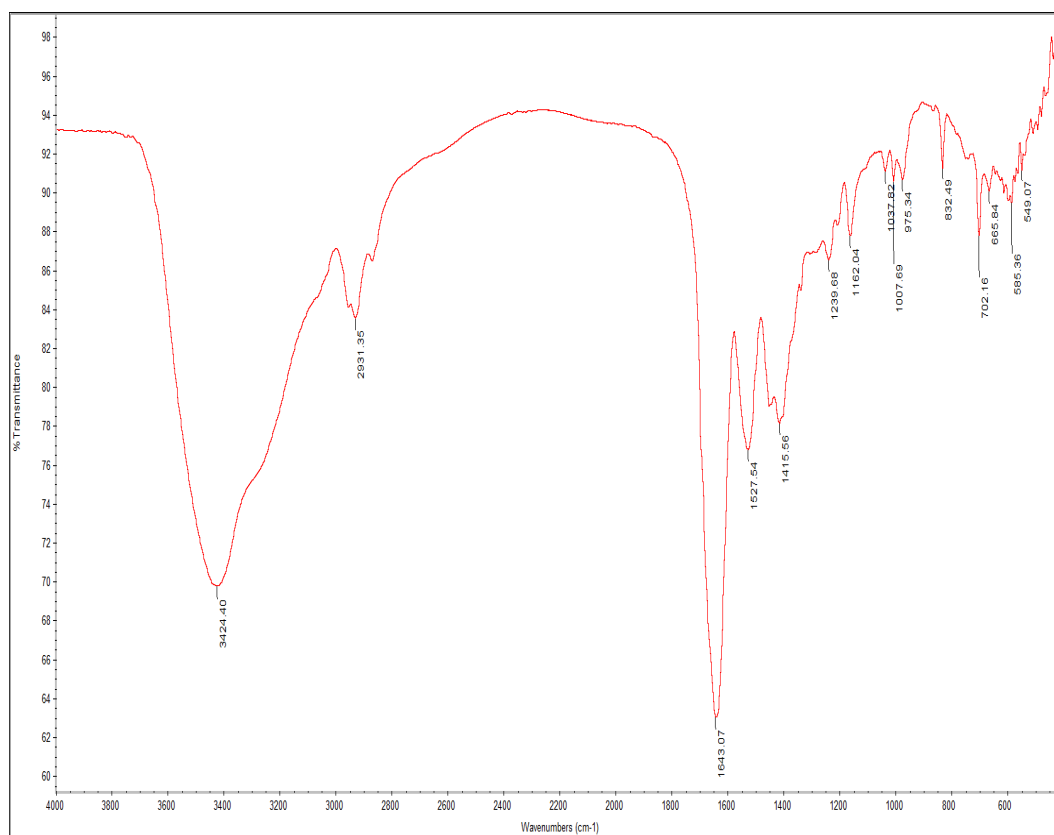

**Figure S24.** IR spectrum of acremoneptide E (2).

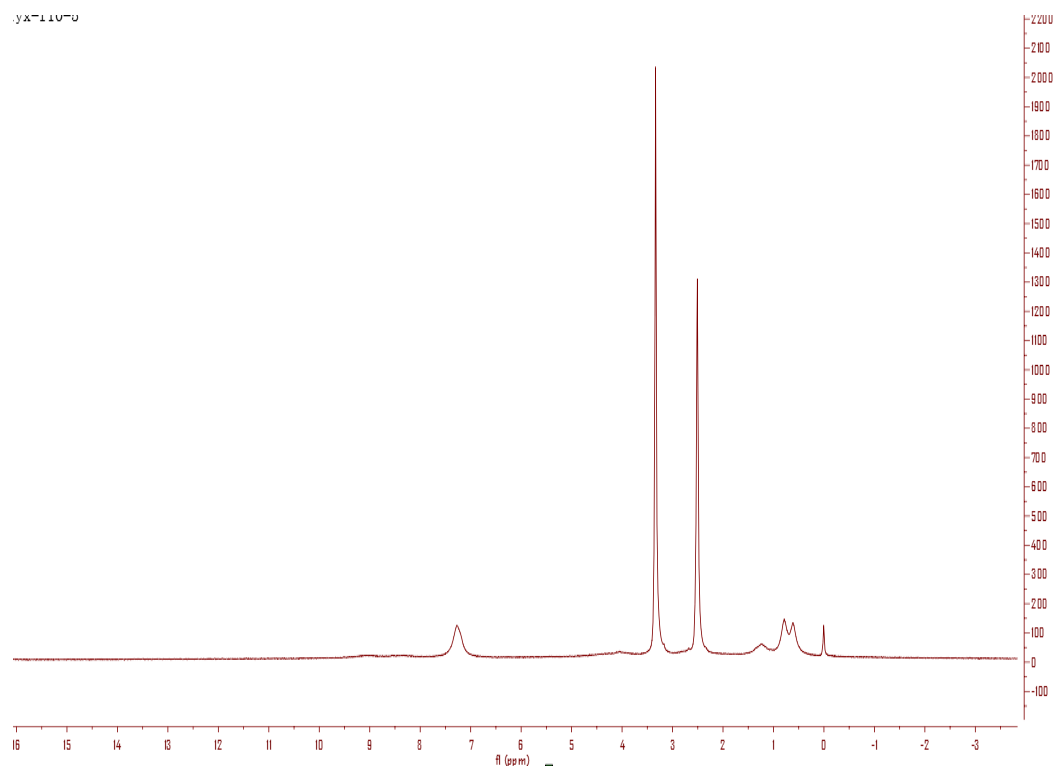

**Figure S25.** <sup>1</sup>H spectrum of Fe (III)-acremnonpeptide E (**3**) in DMSO-*d*<sub>6</sub> (600 MHz).

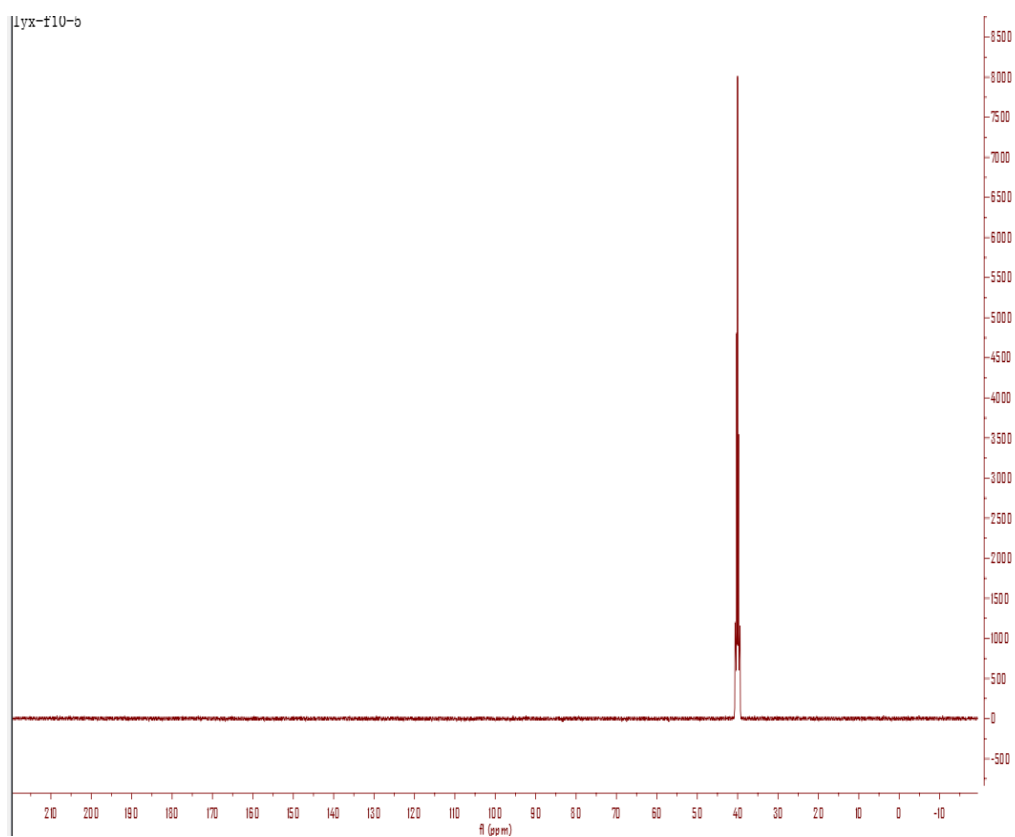

**Figure S26.** <sup>13</sup>C spectrum of Fe (III)-acremnonpeptide E (**3**) in DMSO-*d*<sub>6</sub> (150 MHz).



F10-2

LZY\_20160810\_LYX\_F10-2 47 (0.630)

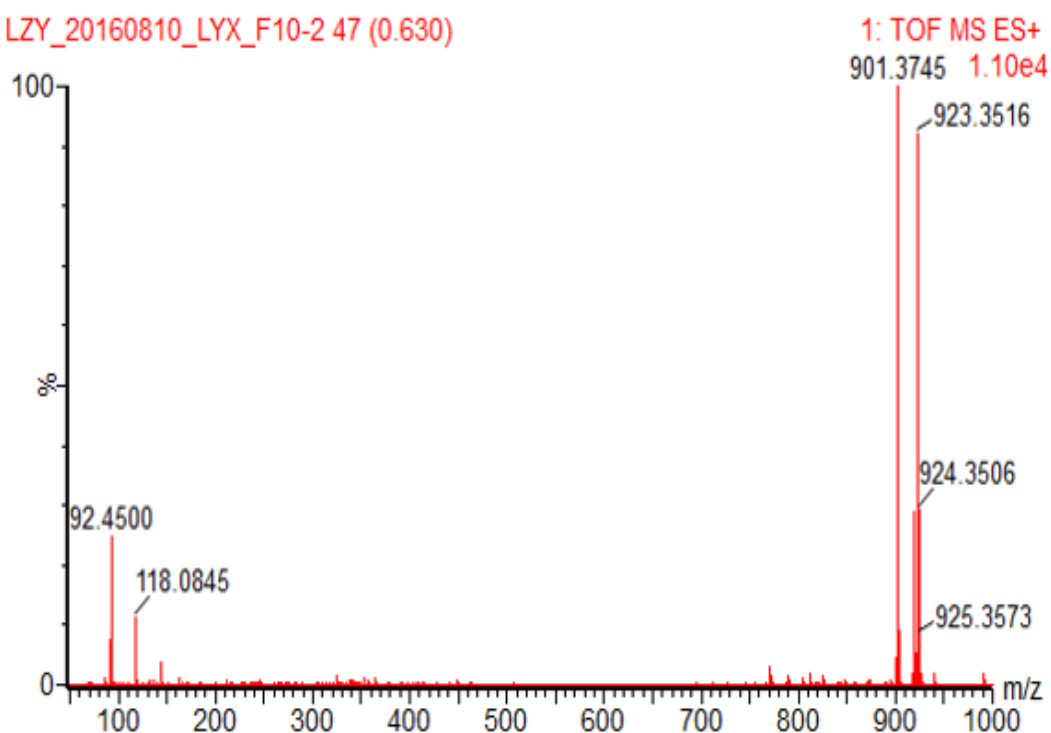

Figure S27. HRESIMS data of Fe (III)-acremonpeptide E (3).

LZY\_20180713\_LYX\_F10-2-MSMS 16 (0.341) Cm (16:17)

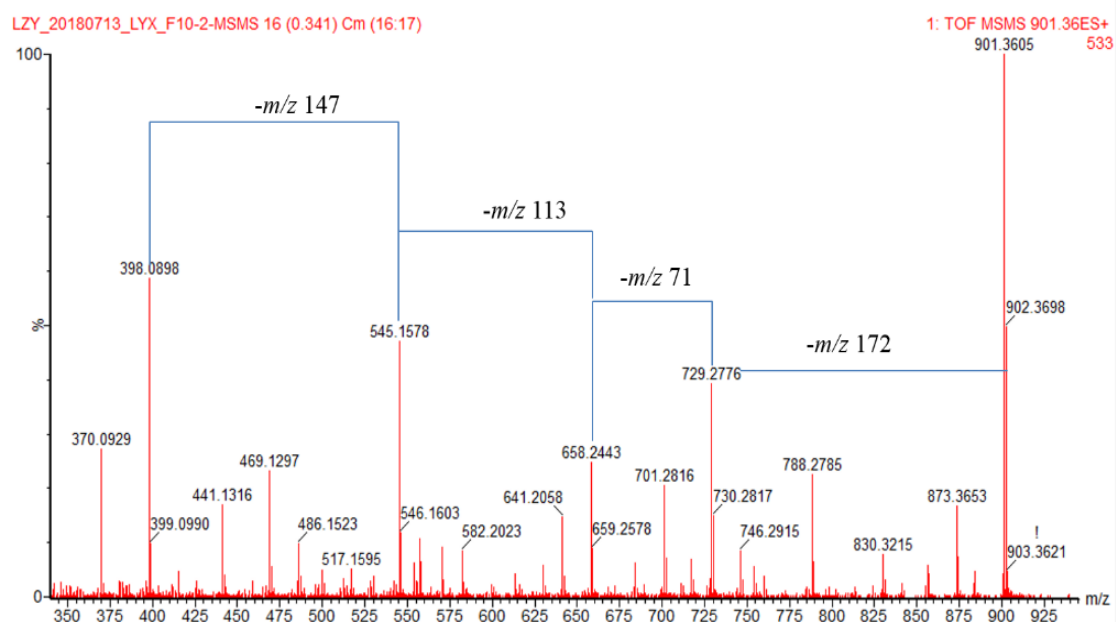

Figure S28. HRESIMS/MS fragmentation ions of Fe (III)-acremonpeptide E (3).

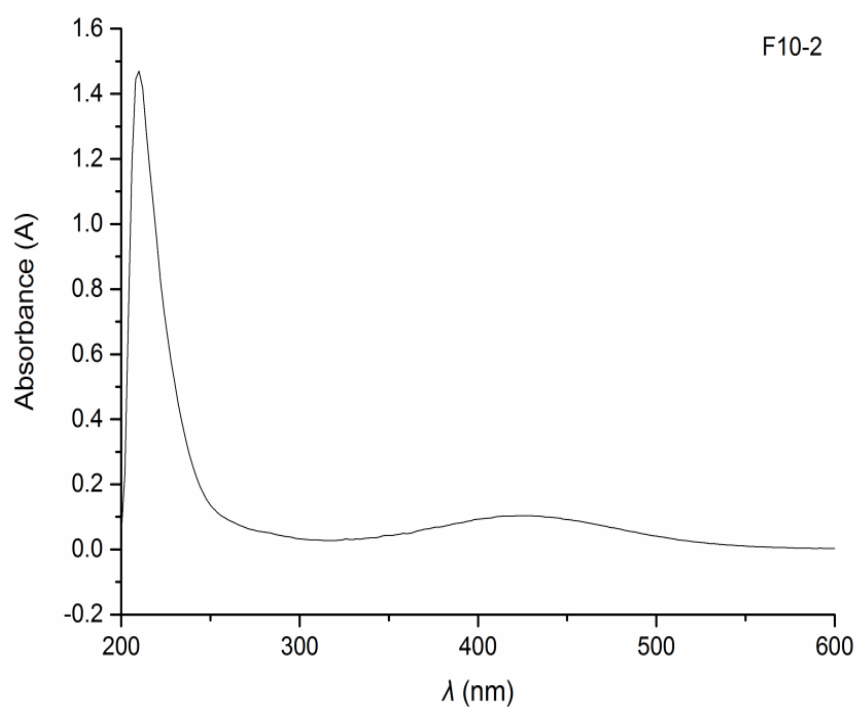

**Figure S29.** UV spectrum of Fe (III)-acremonpeptide E (**3**) in MeOH.

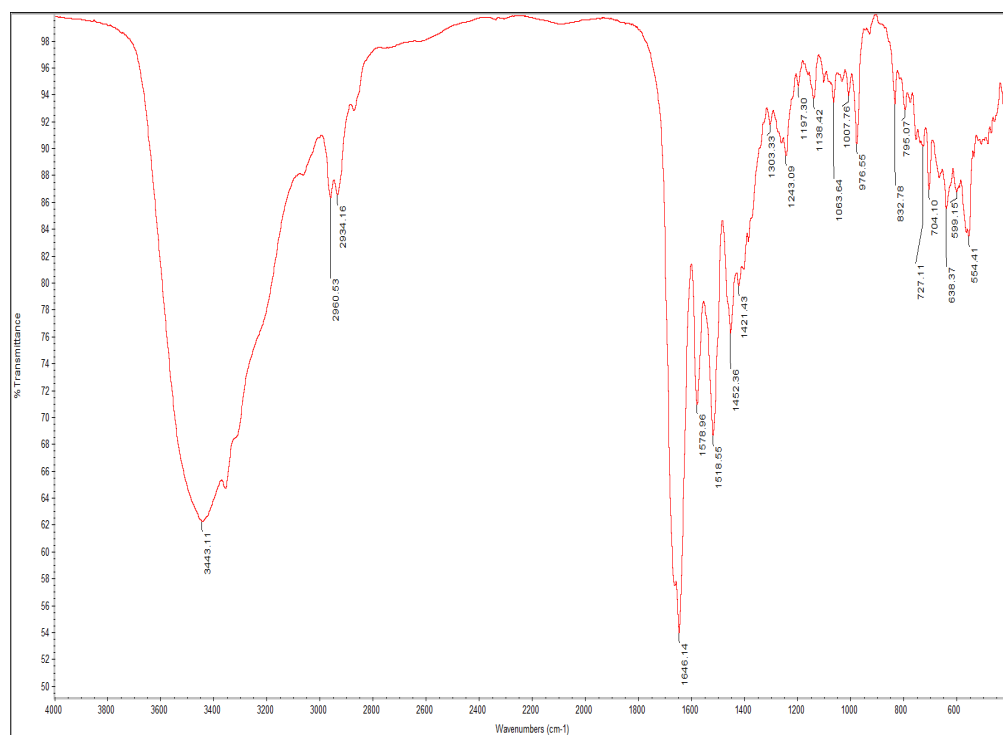

**Figure S30.** IR spectrum of Fe (III)-acremonpeptide E (**3**).

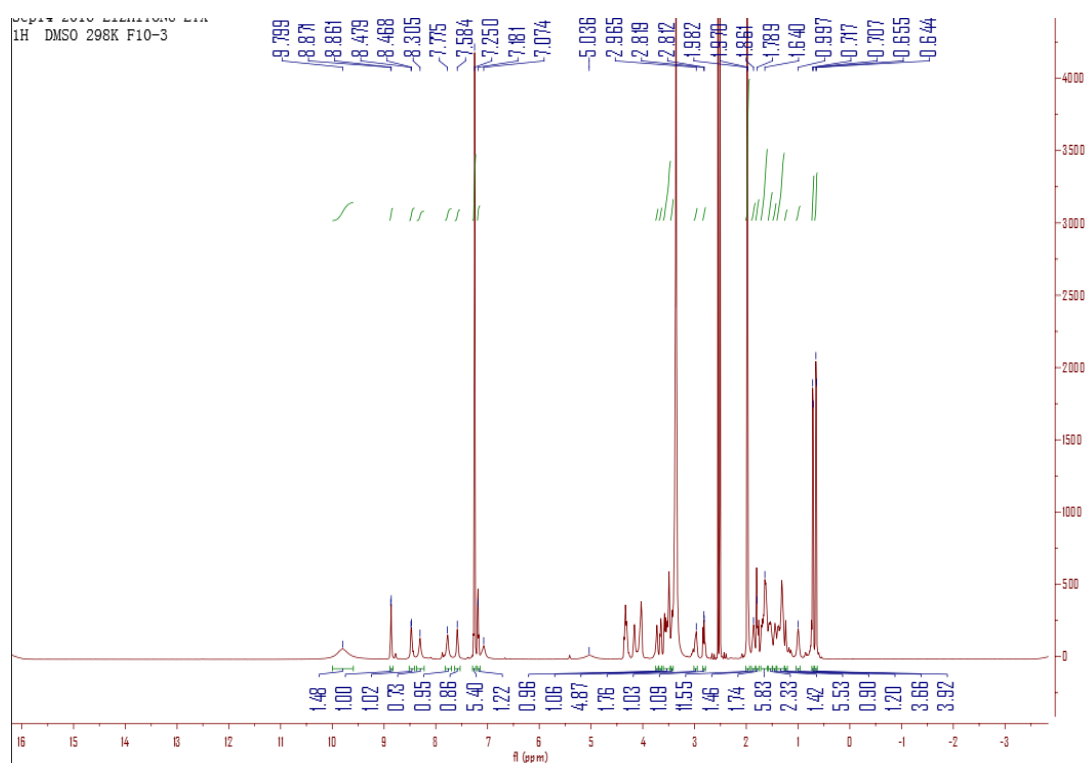

**Figure S31.**  $^1\text{H}$  spectrum of acremonpeptide F (**4**) in  $\text{DMSO-}d_6$  (600 MHz).

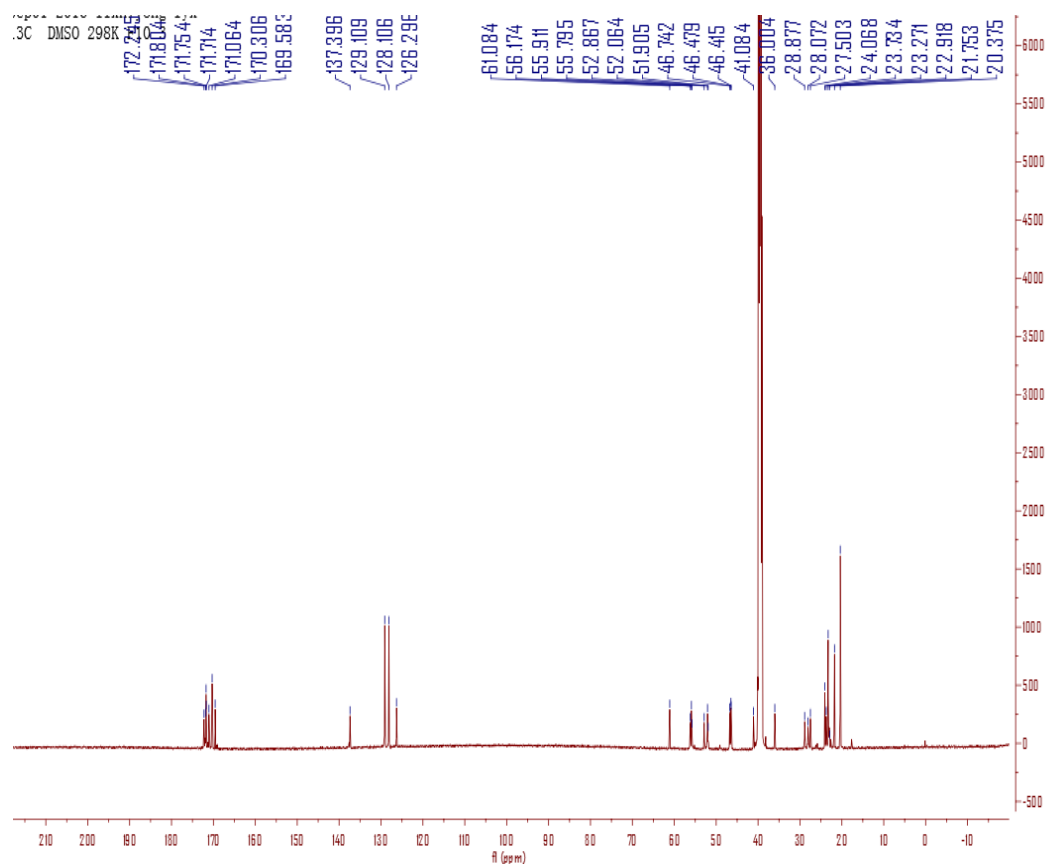

**Figure S32.**  $^{13}\text{C}$  spectrum of acremonpeptide F (**4**) in  $\text{DMSO-}d_6$  (150 MHz).

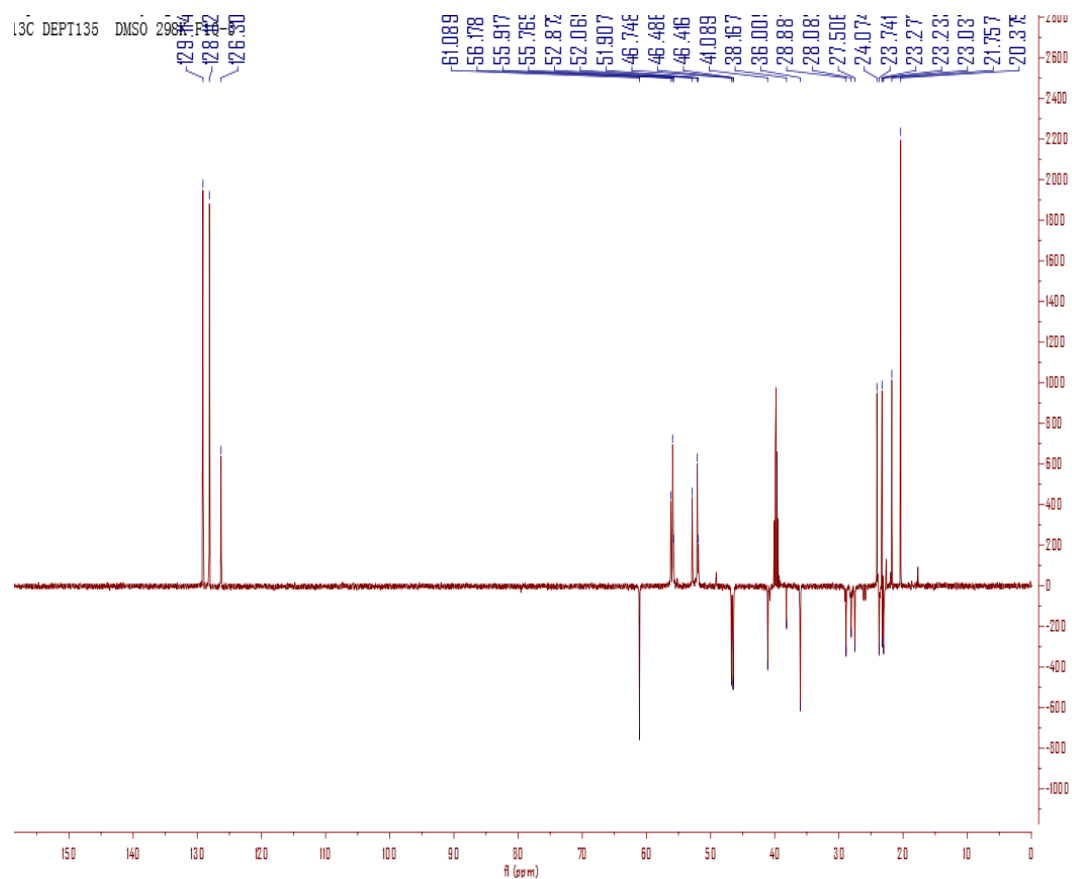

**Figure S33.** DEPT135 spectrum of acrimonpeptide F (**4**) in DMSO- $d_6$  (150 MHz).

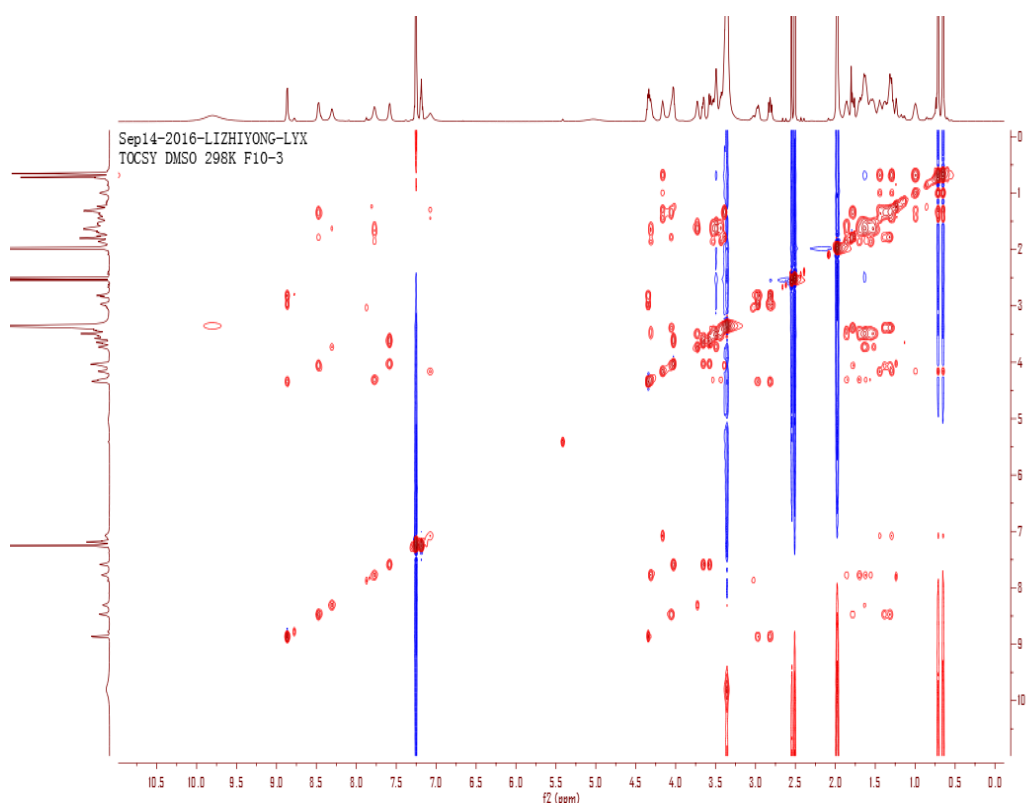

**Figure S34.** TOCSY spectrum of acrimonpeptide F (**4**) in DMSO- $d_6$ .

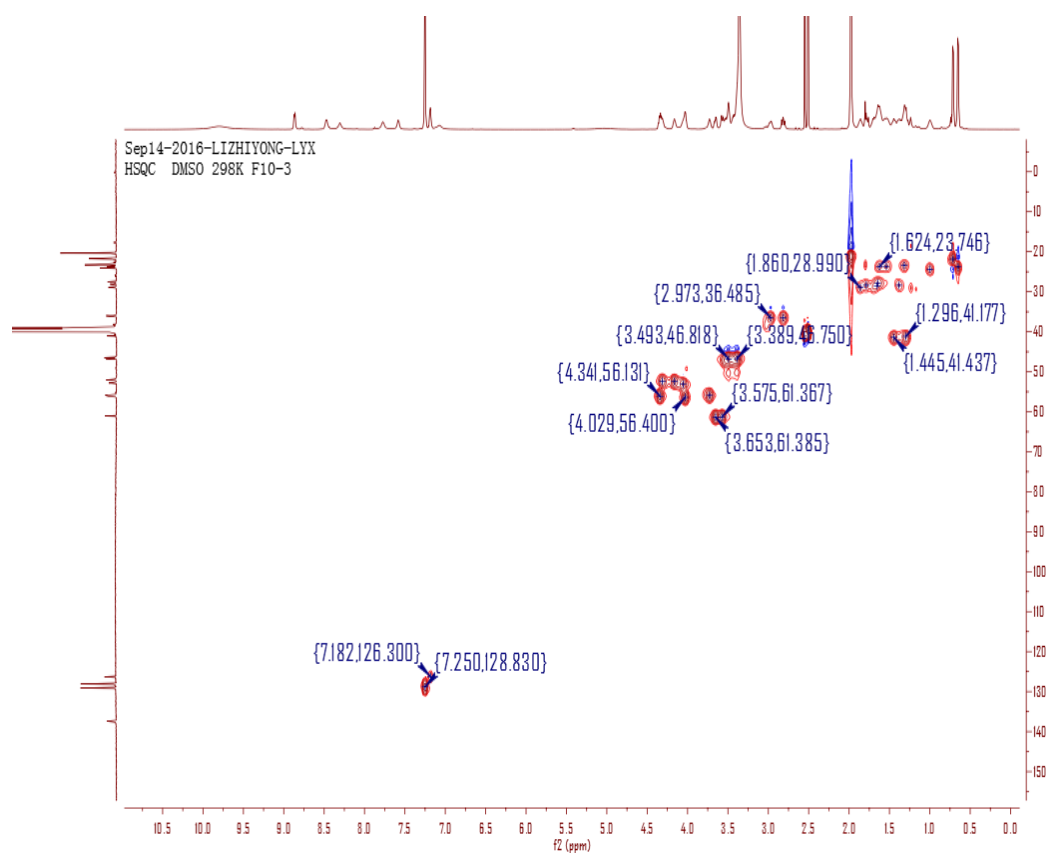

**Figure S35.** HSQC spectrum of acremoneptide F (**4**) in DMSO-*d*<sub>6</sub>.

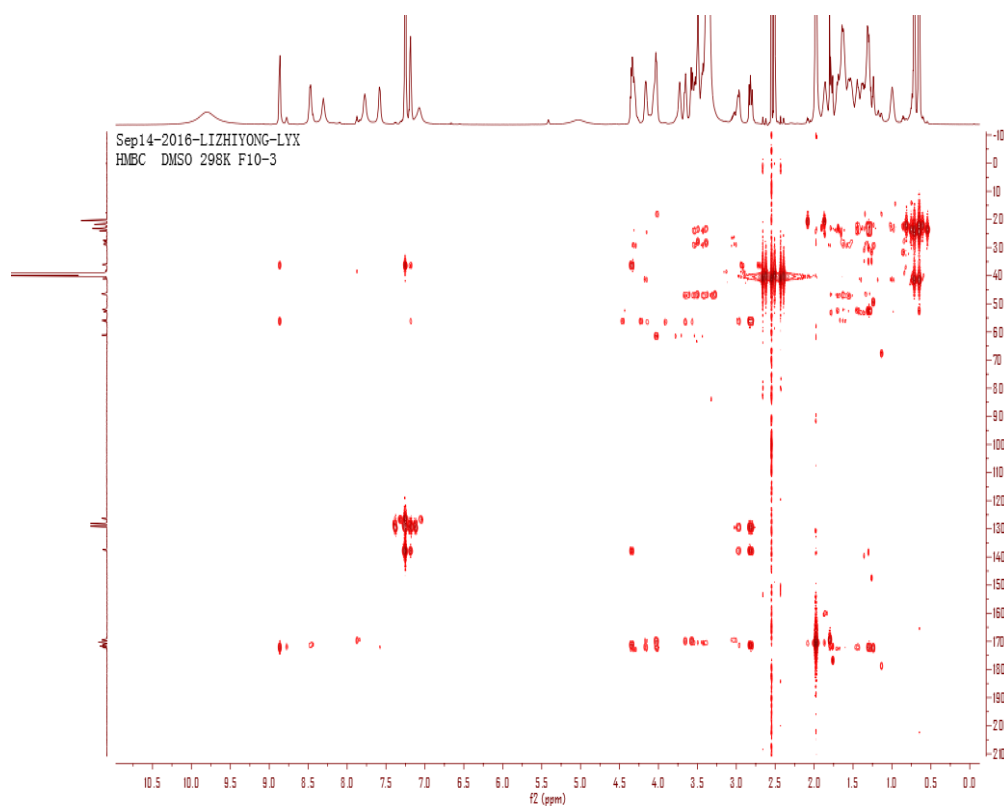

**Figure S36.** HMBC spectrum of acremoneptide F (**4**) in DMSO-*d*<sub>6</sub>.

F10-3

LZY\_20160913\_LYX\_F10-3\_LCMS 427 (4.915) Cm (427:428)

1: TOF MS ES+  
1.14e5

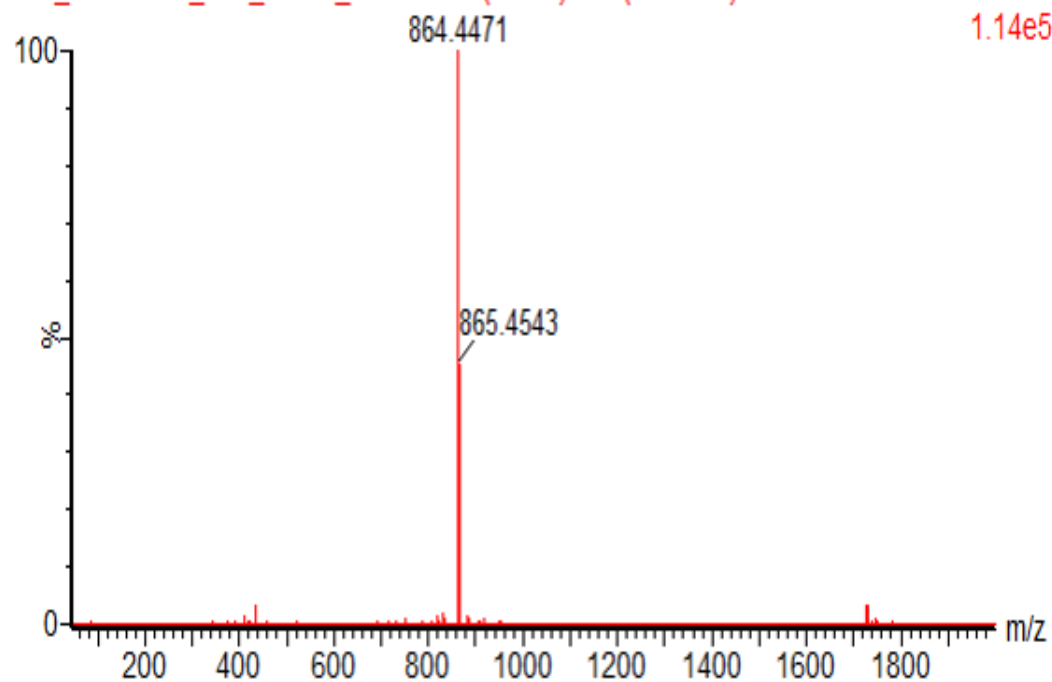

Figure S37. HRESIMS data of acremoneptide F (4).

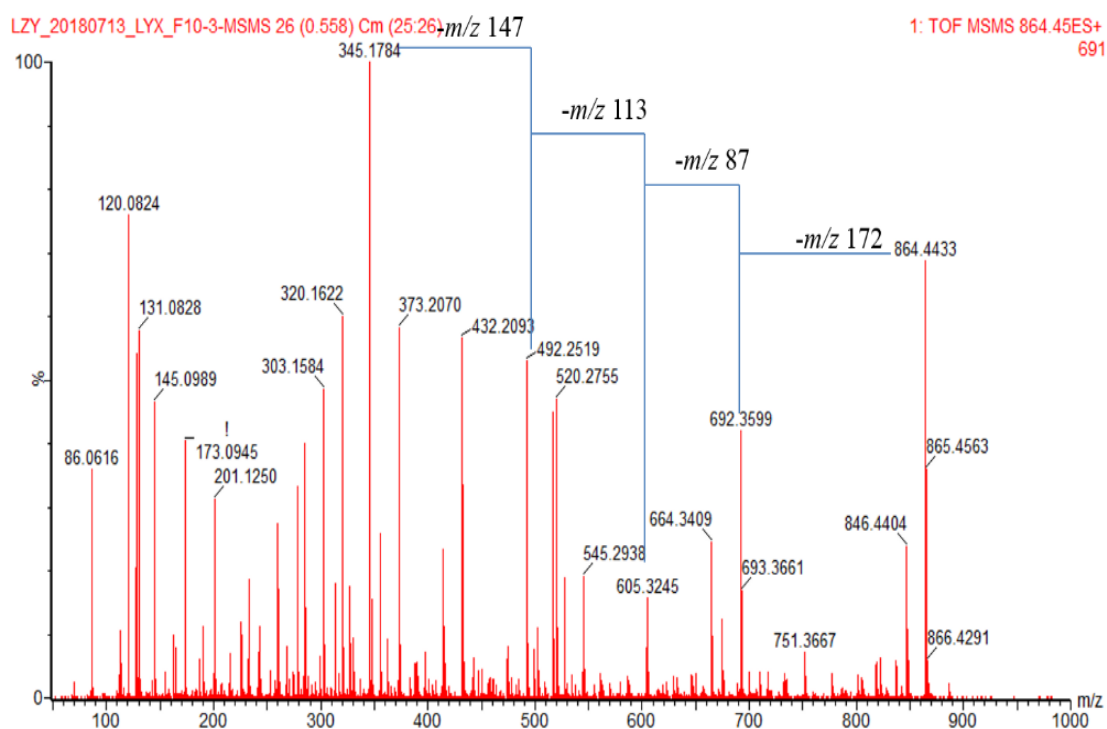

Figure S38. HRESIMS/MS fragmentation ions of acremoneptide F (4).

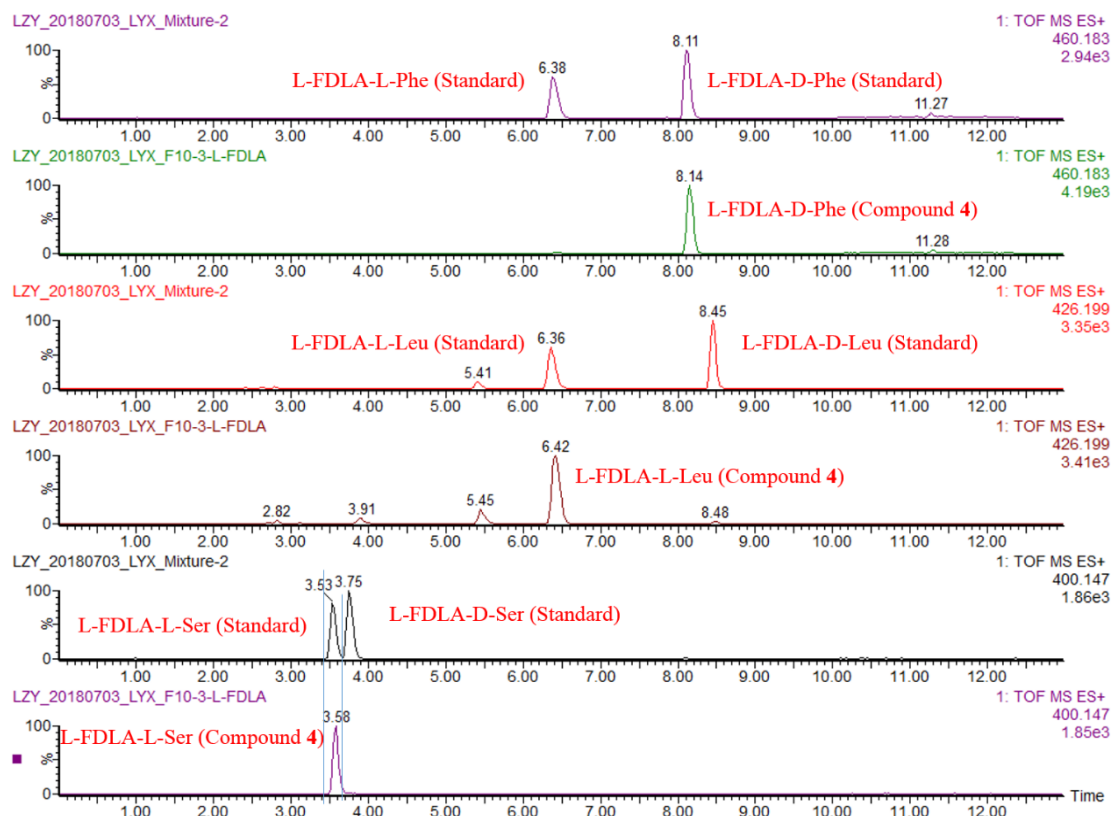

**Figure S39.** Mass chromatograms of the L-FDLA derivatives of standard amino acids and amino acids from acremonpeptide F (4).

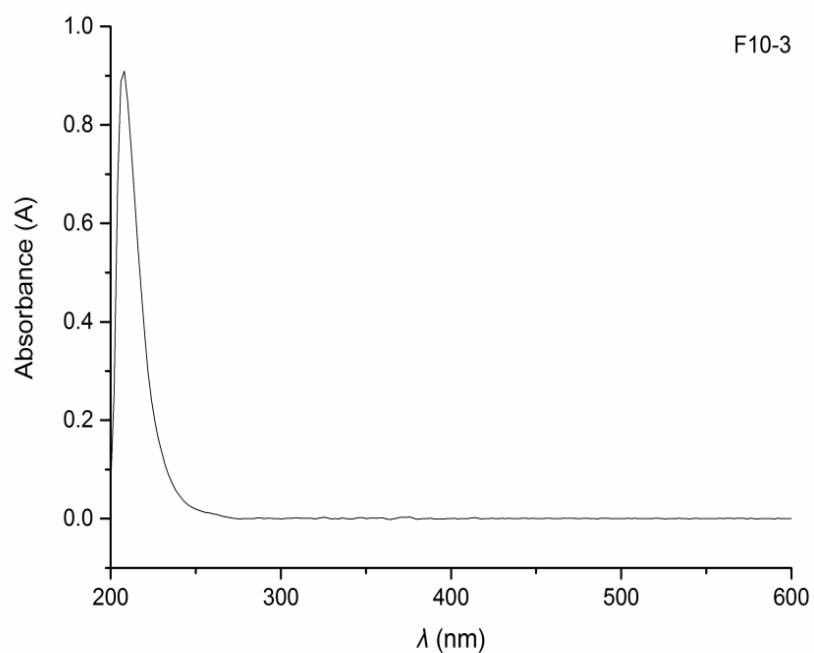

**Figure S40.** UV spectrum of acremonpeptide F (4) in MeOH.

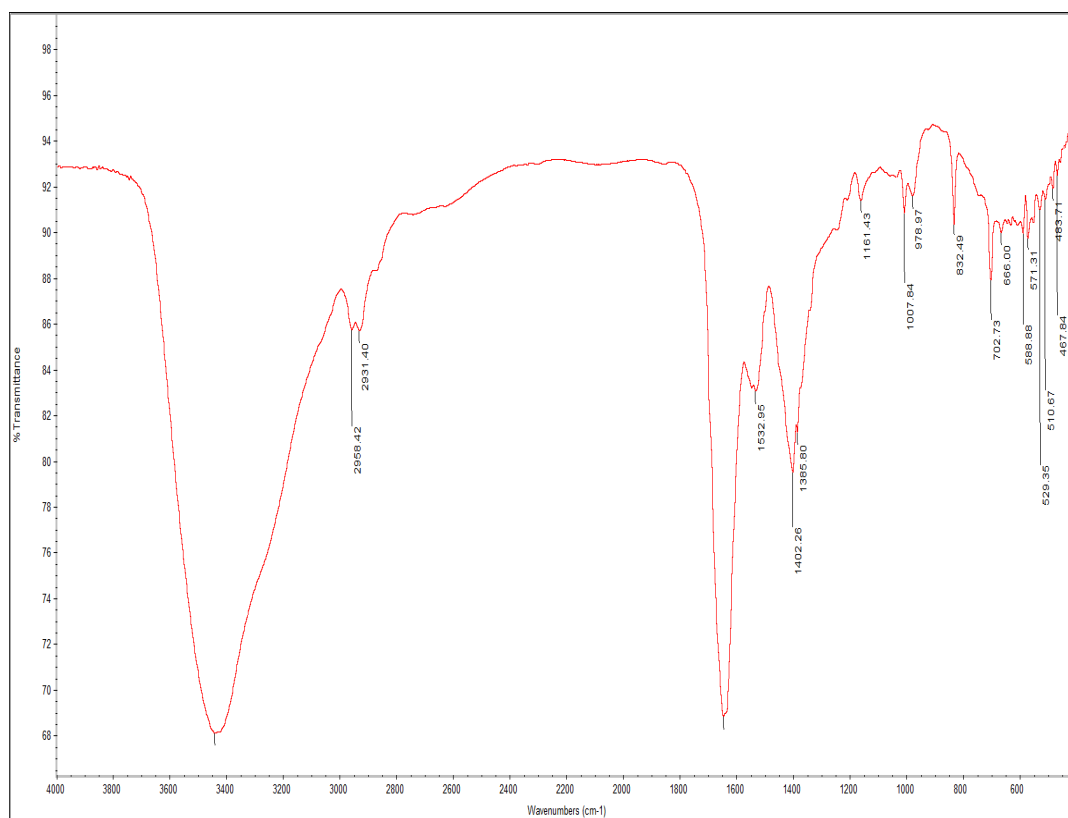

**Figure S41.** IR spectrum of acremonpeptide F (4).

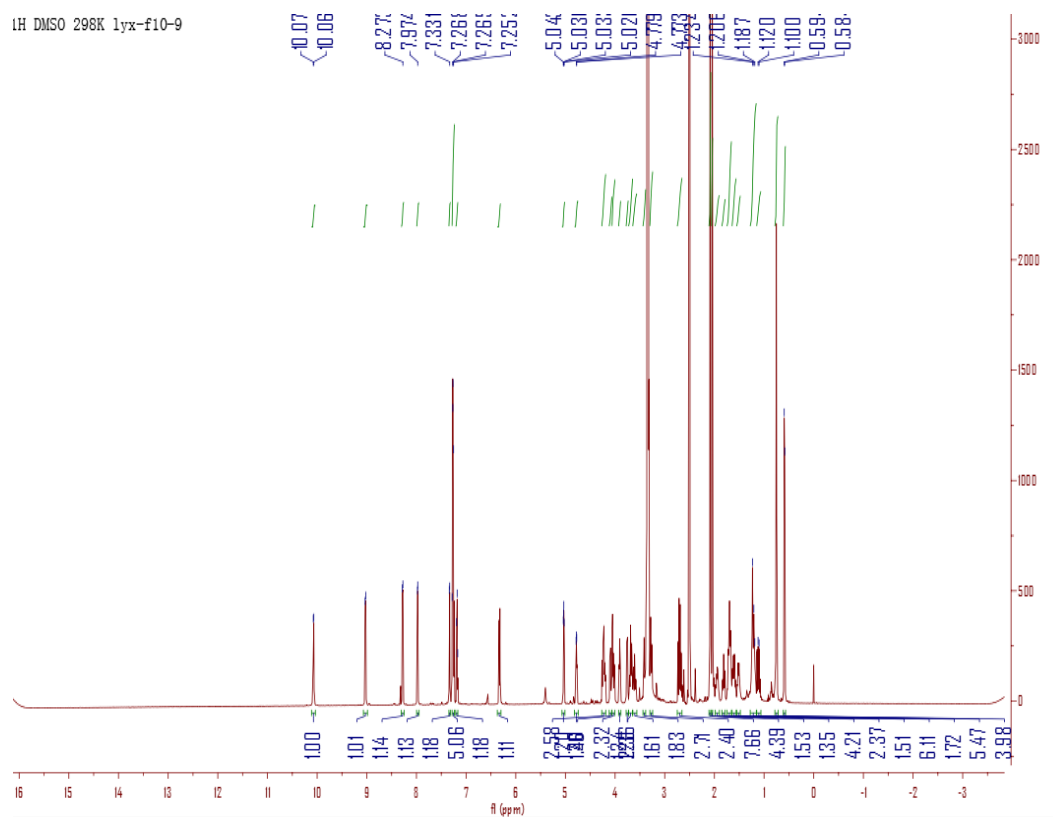

**Figure S42.** <sup>1</sup>H spectrum of Al (III)-acremonpeptide F (5) in DMSO-*d*<sub>6</sub> (600 MHz).



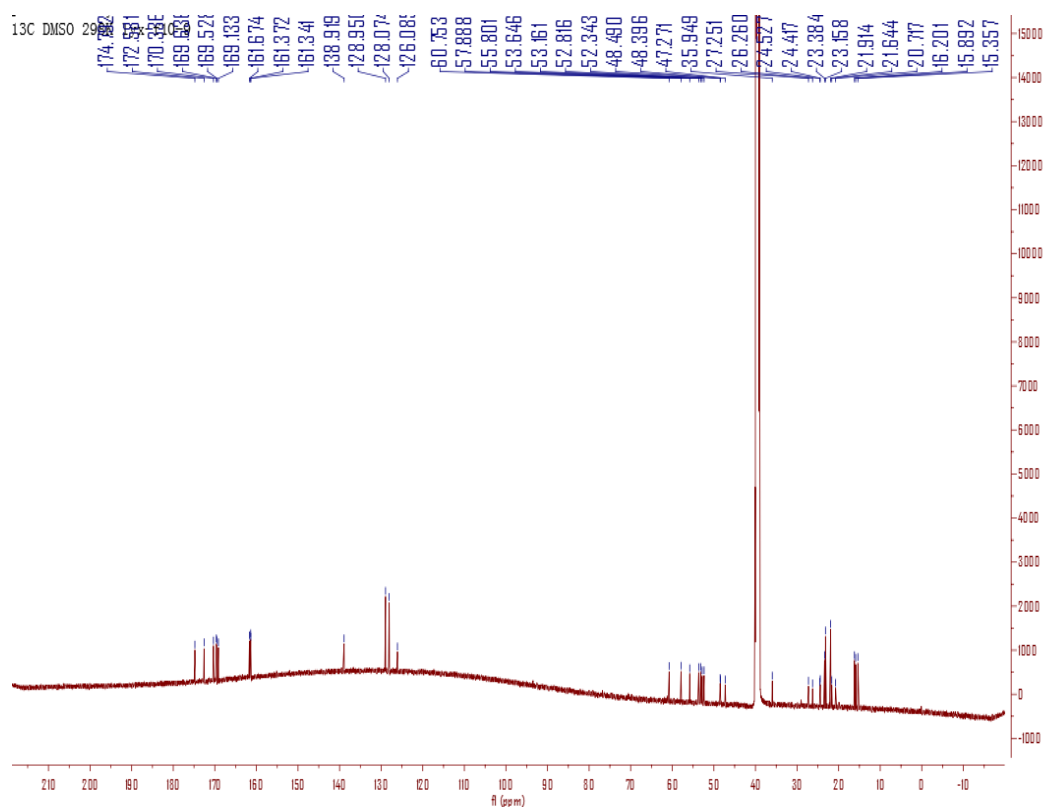

**Figure S43.** <sup>13</sup>C spectrum of Al (III)-acremonpeptide F (5) in DMSO-*d*<sub>6</sub> (150 MHz).

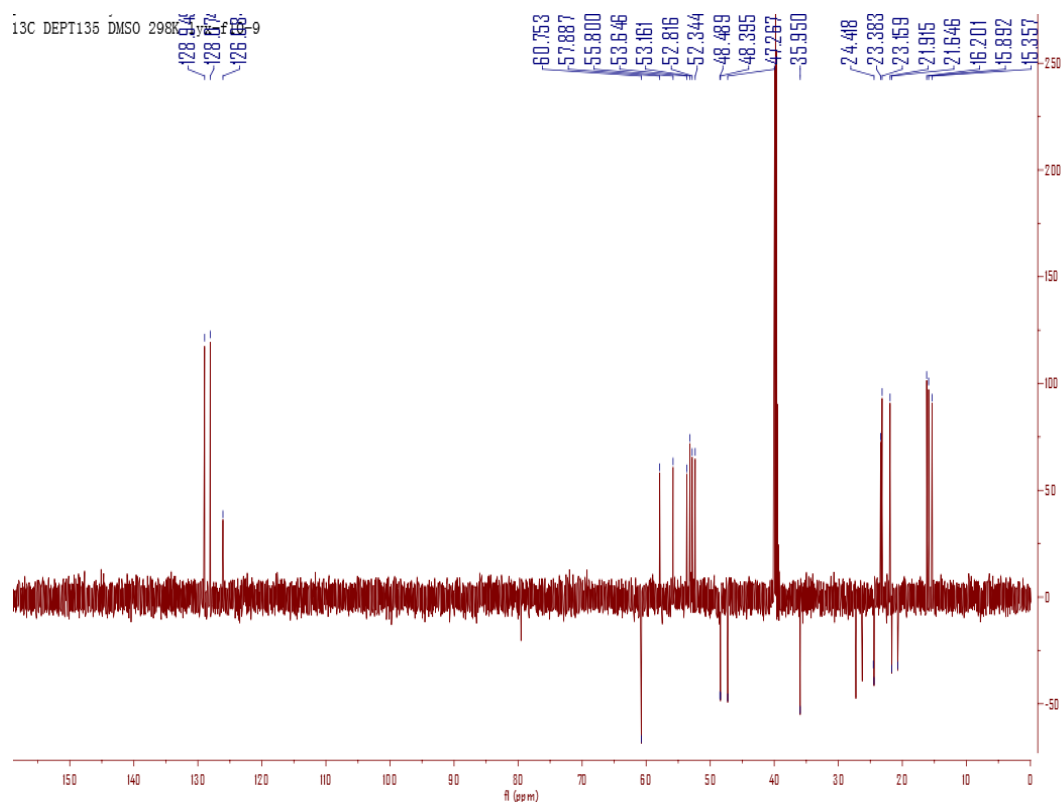

**Figure S44.** DEPT135 spectrum of Al (III)-acremonpeptide F (5) in DMSO-*d*<sub>6</sub> (150 MHz).

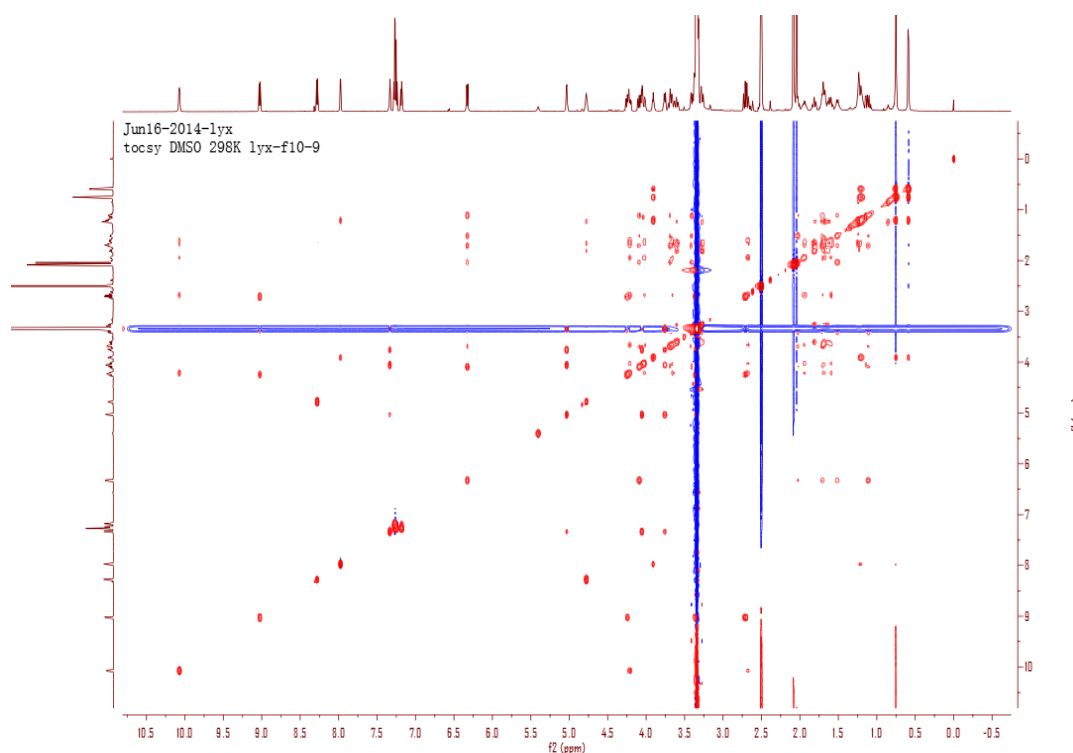

**Figure S45.** TOCSY spectrum of Al (III)-acremoneptide F (**5**) in DMSO- $d_6$ .

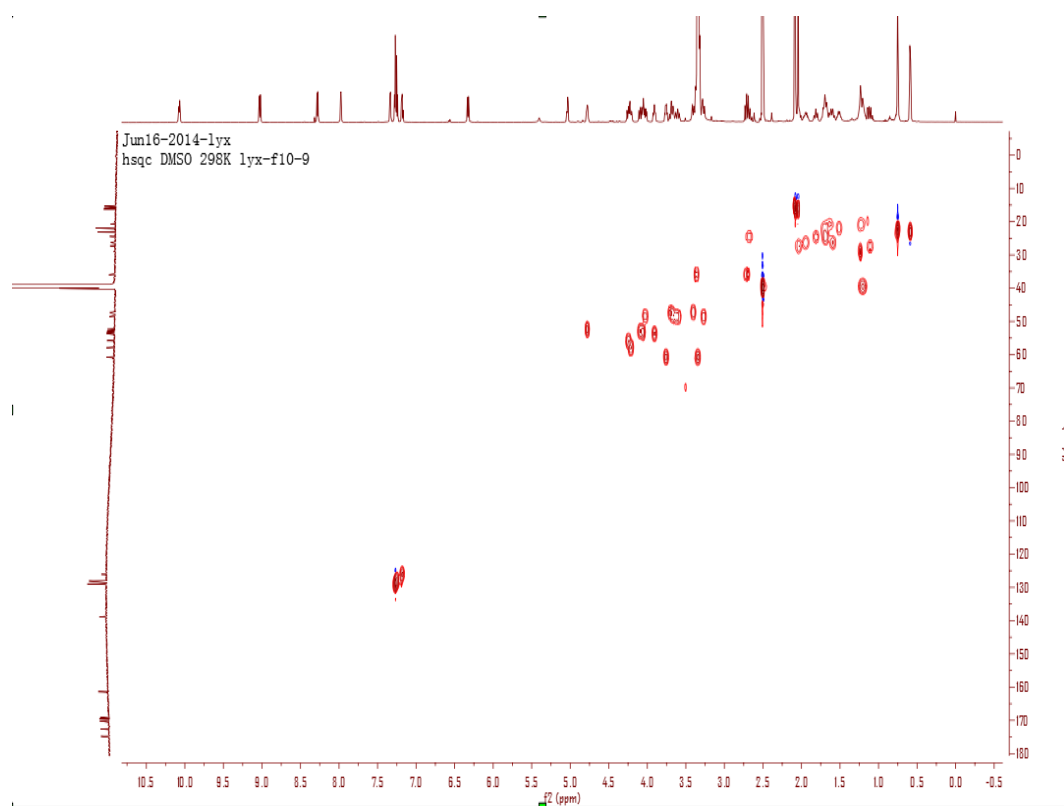

**Figure S46.** HSQC spectrum of Al (III)-acremoneptide F (**5**) in DMSO- $d_6$ .

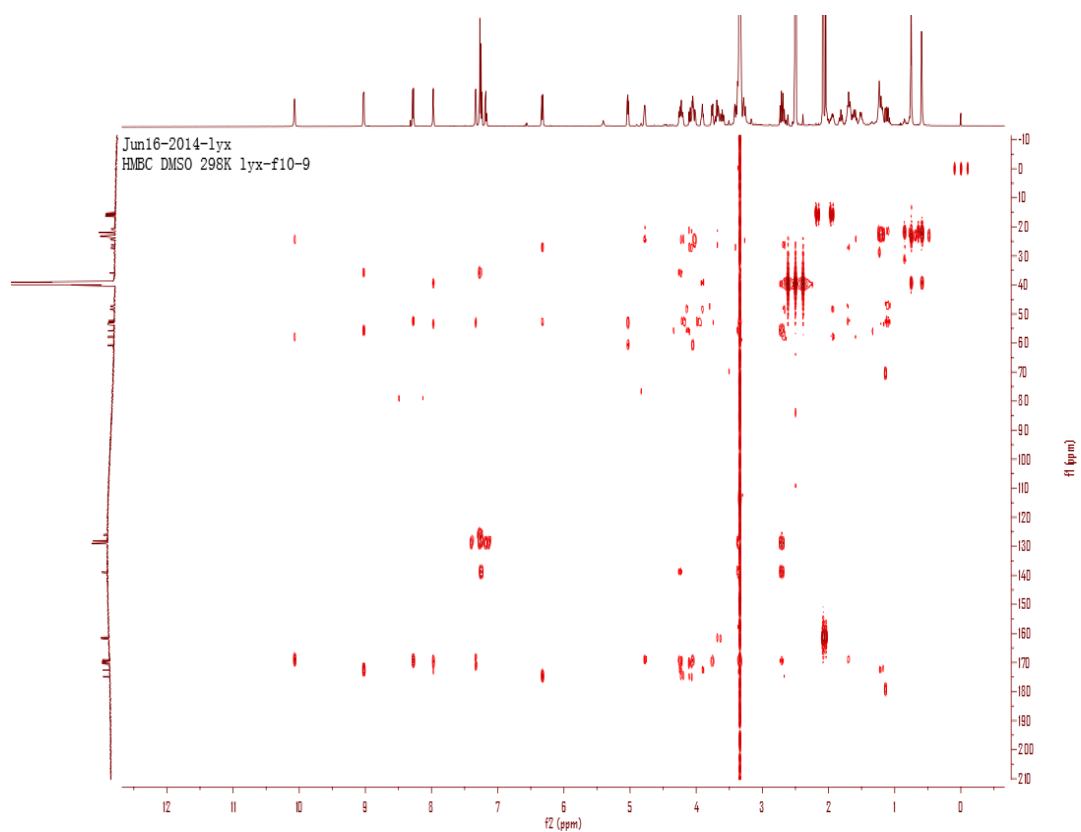

**Figure S47.** HMBC spectrum of Al (III)-acremoneptide F (**5**) in DMSO- $d_6$ .

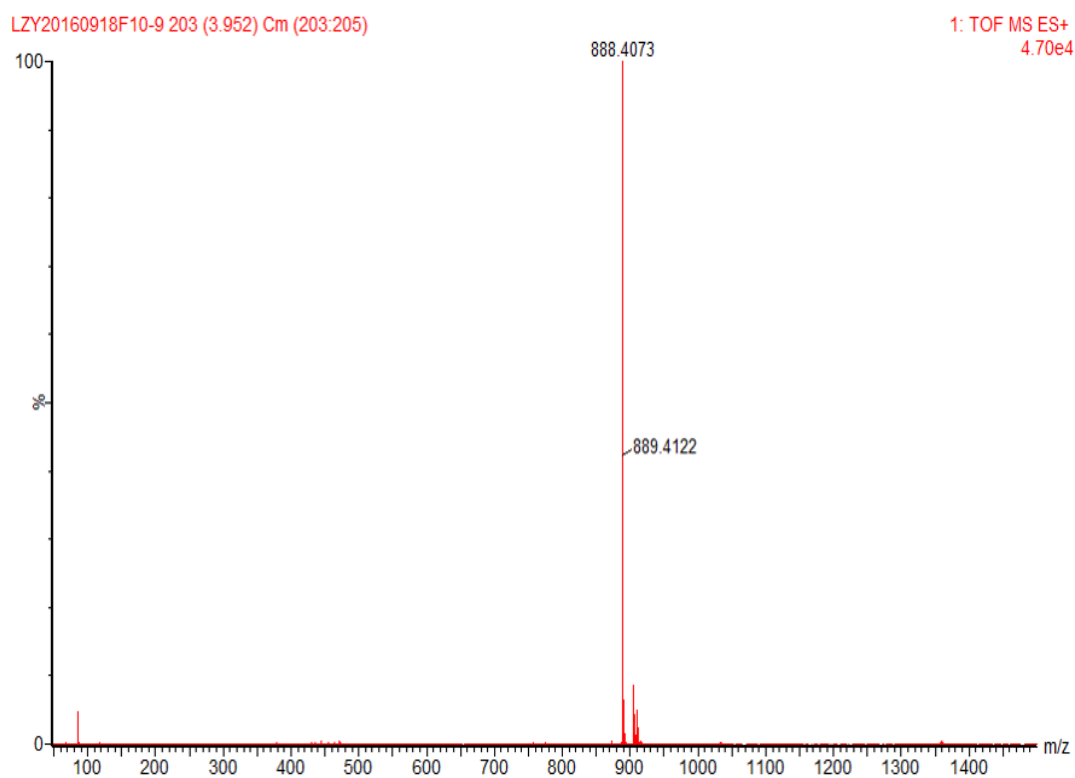

**Figure S48.** HRESIMS data of Al (III)-acremoneptide F (**5**).

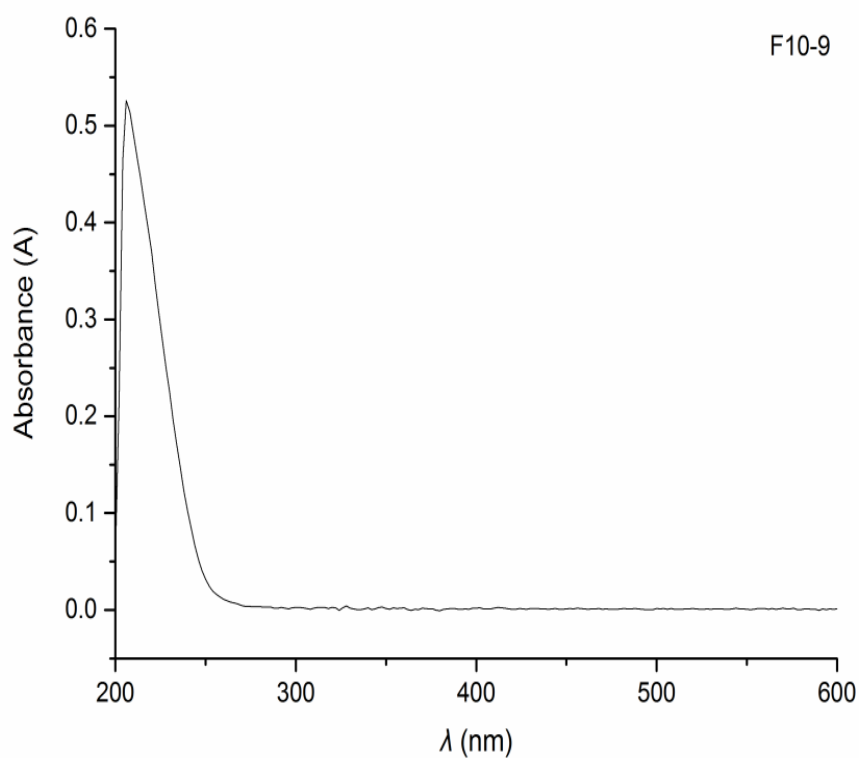

**Figure S49.** UV spectrum of Al (III)-acremoneptide F (5) in MeOH.

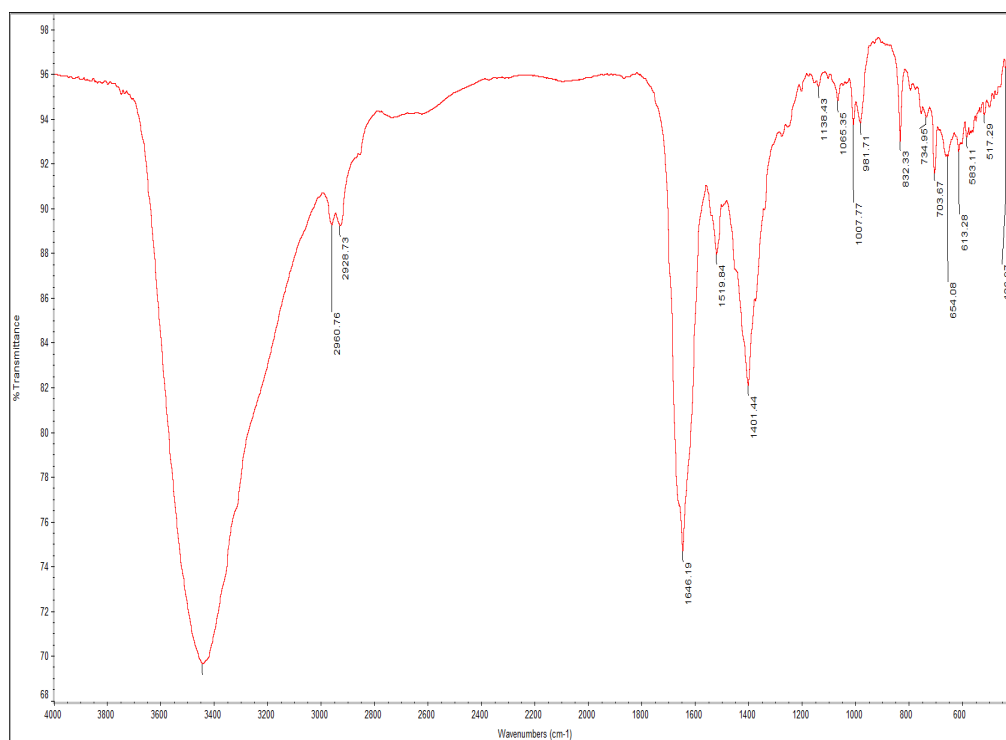

**Figure S50.** IR spectrum of Al (III)-acremoneptide F (5).

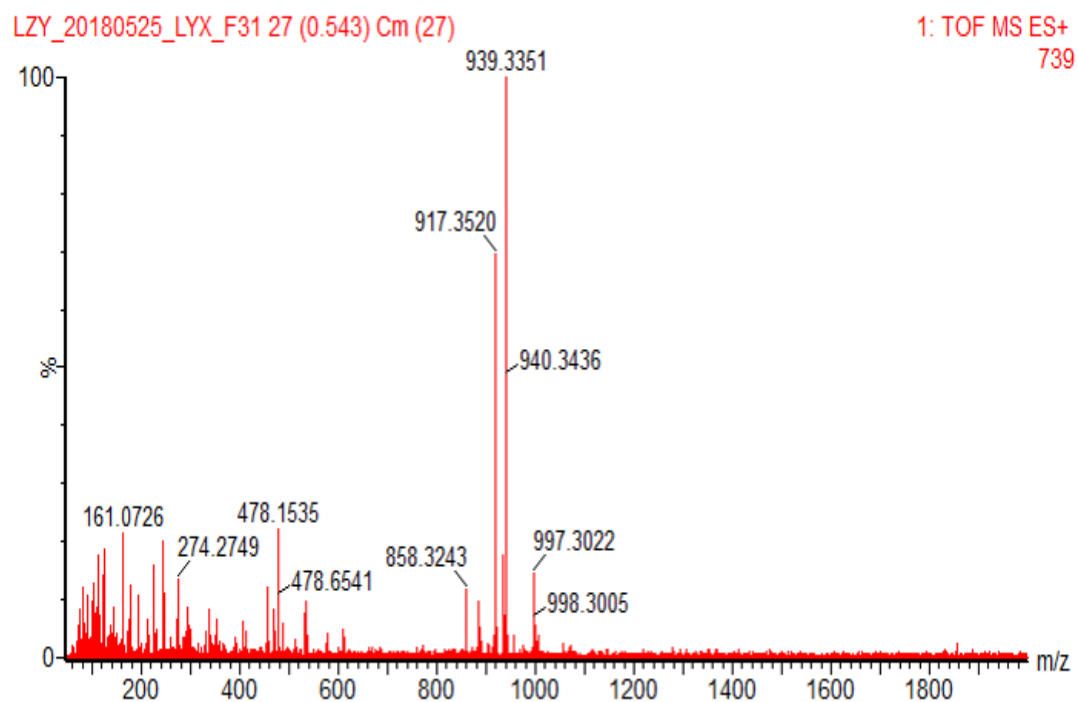

**Figure S51.** HRESIMS data of Fe (III)-acremoneptide F (**6**).

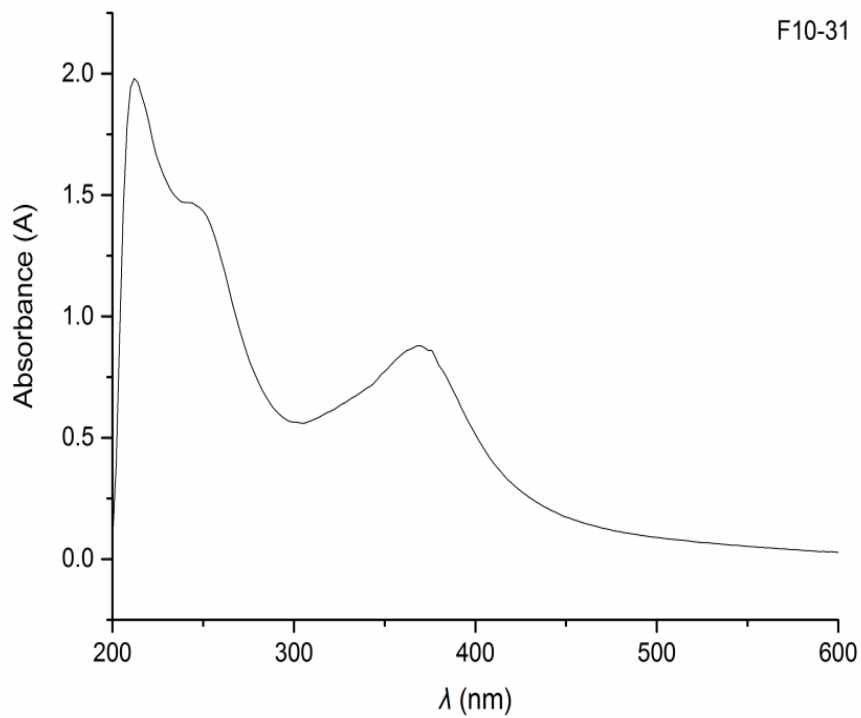

**Figure S52.** UV spectrum of Fe (III)-acremoneptide F (**6**) in MeOH.

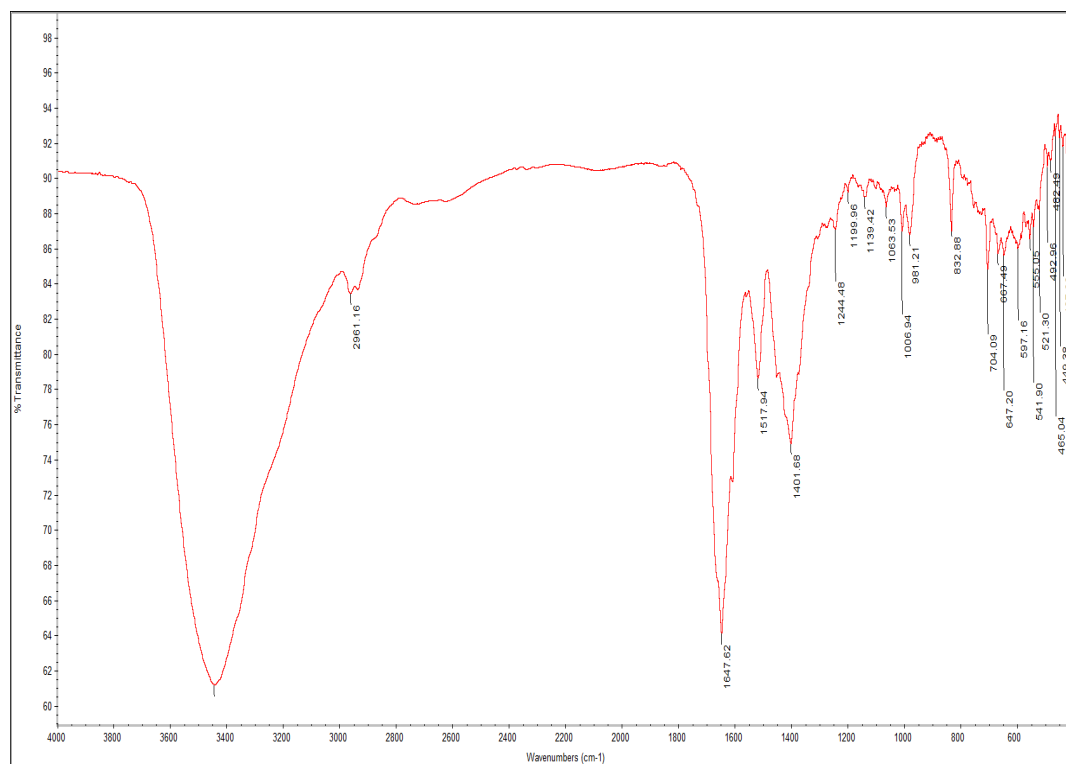

**Figure S53.** IR spectrum of Fe (III)-acremnonpeptide F (6).

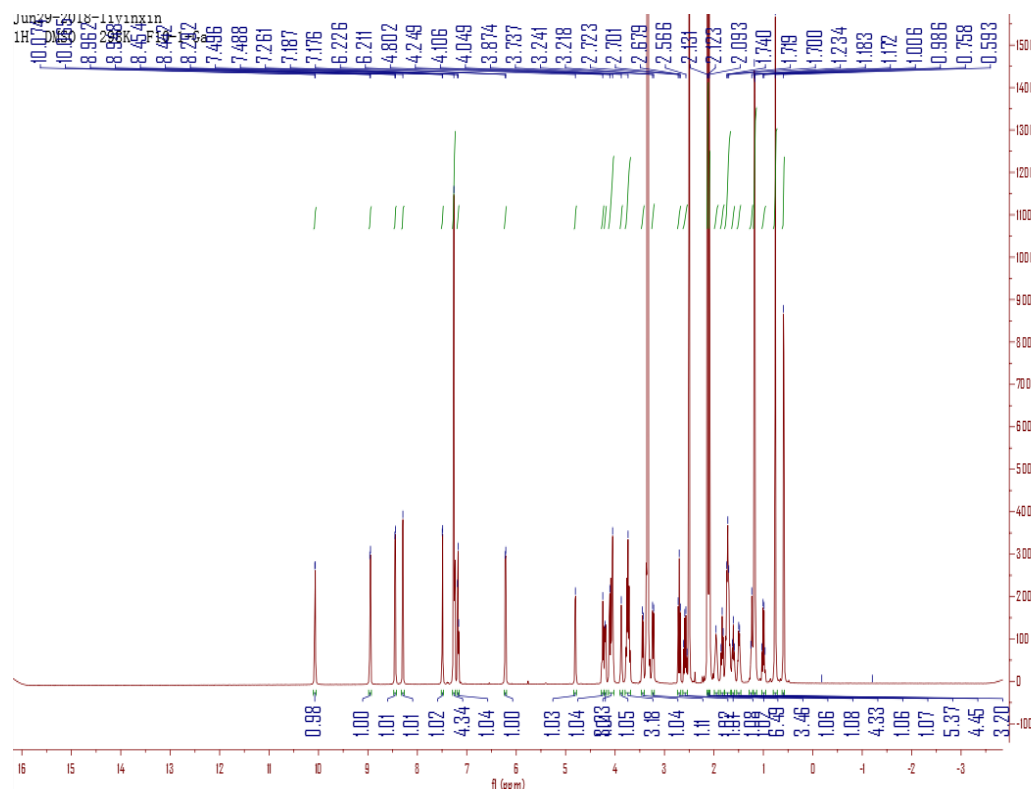

**Figure S54.** <sup>1</sup>H spectrum of Ga (III)-acremnonpeptide E (7) in DMSO-d<sub>6</sub> (600 MHz).

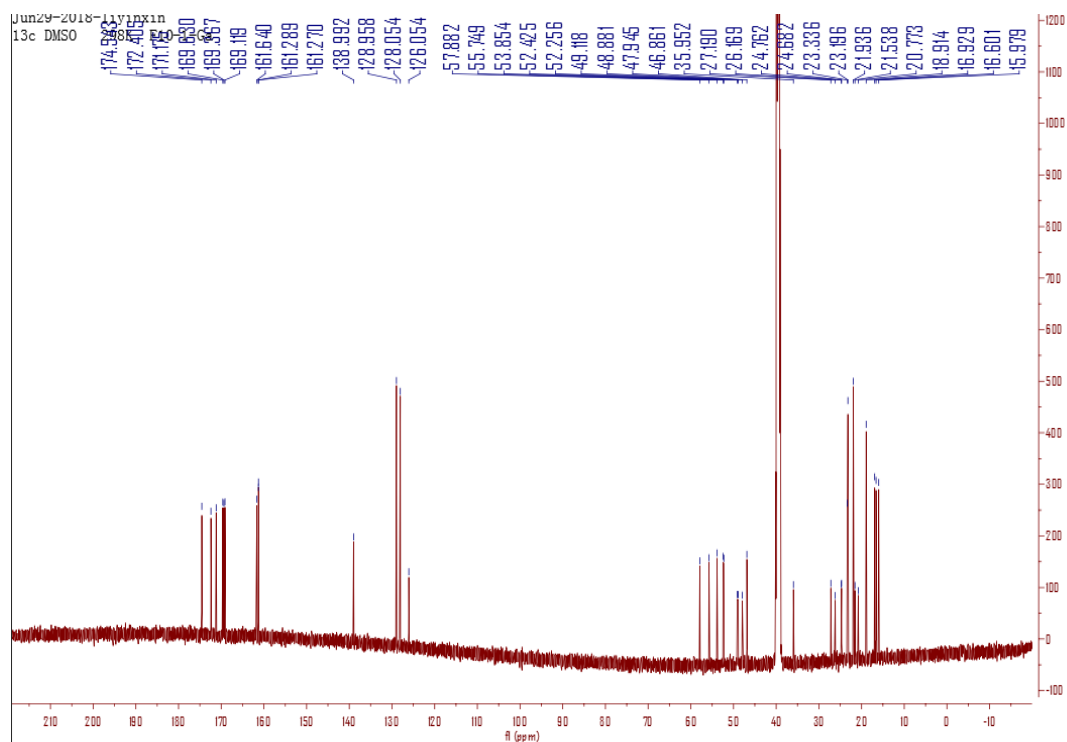

**Figure S55.**  $^{13}\text{C}$  spectrum of Ga (III)-acremontepeptide E (7) in  $\text{DMSO}-d_6$  (150 MHz).

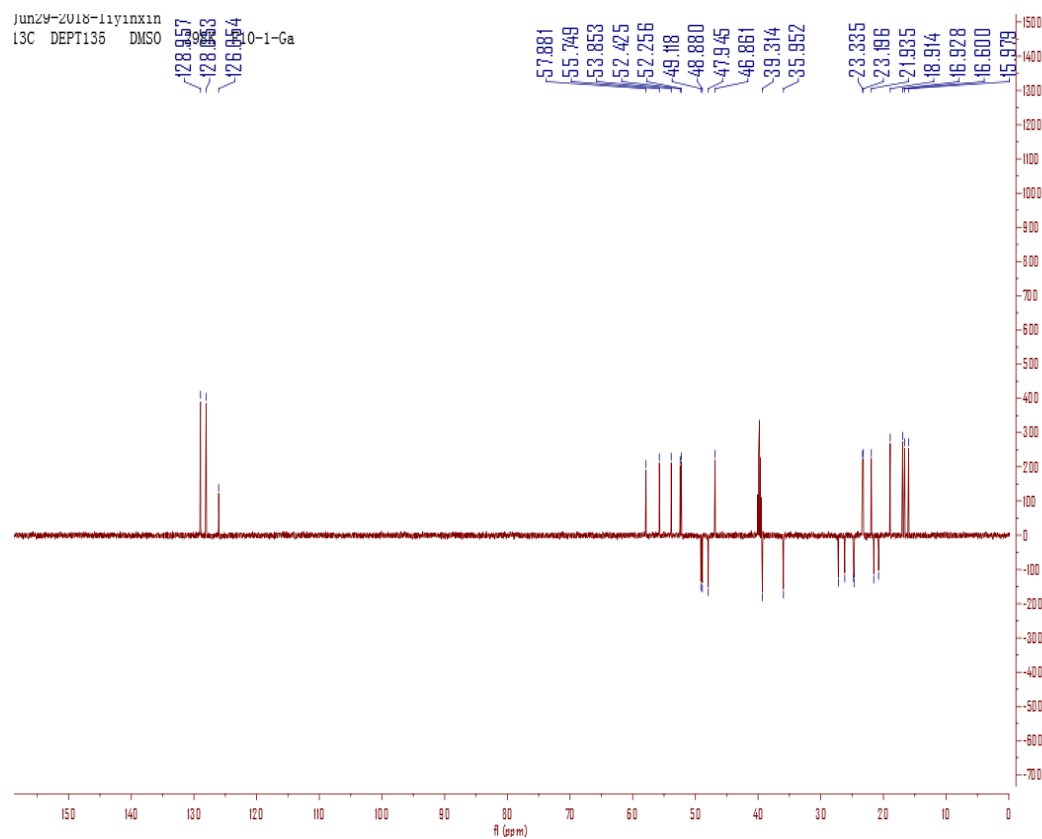

**Figure S56.** DEPT135 spectrum of Ga (III)-acremontepeptide E (7) in  $\text{DMSO}-d_6$  (150 MHz).

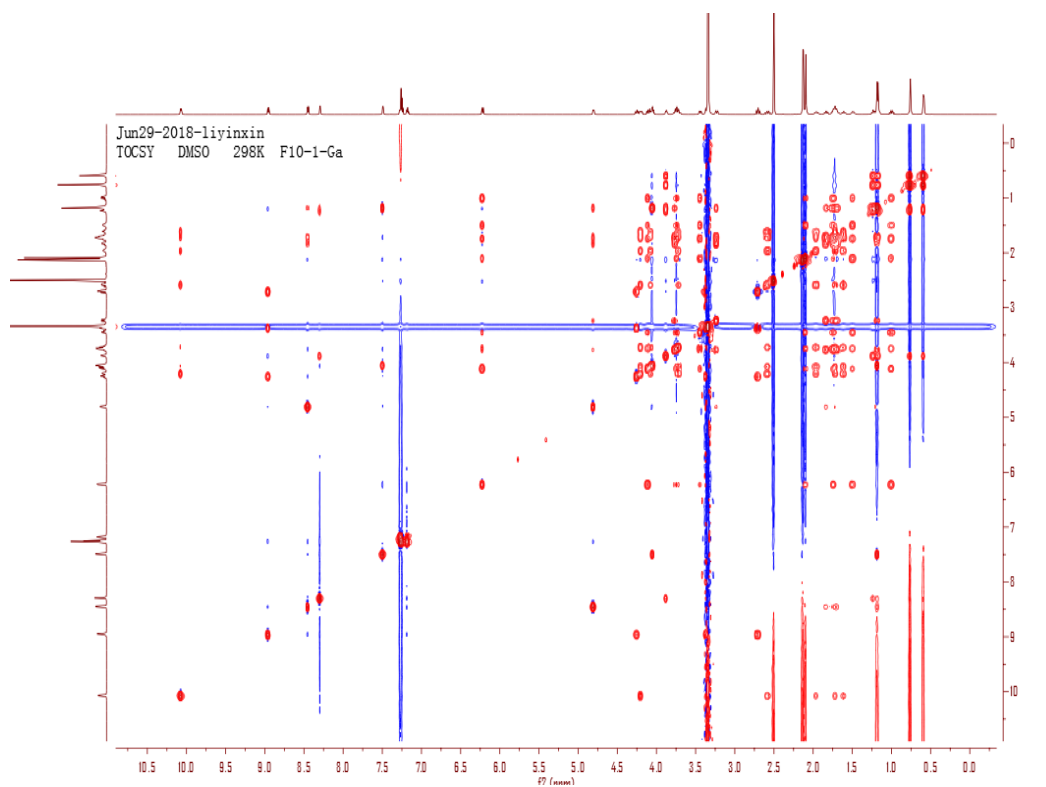

**Figure S57.** TOCSY spectrum of Ga (III)-acremoneptide E (7) in DMSO- $d_6$

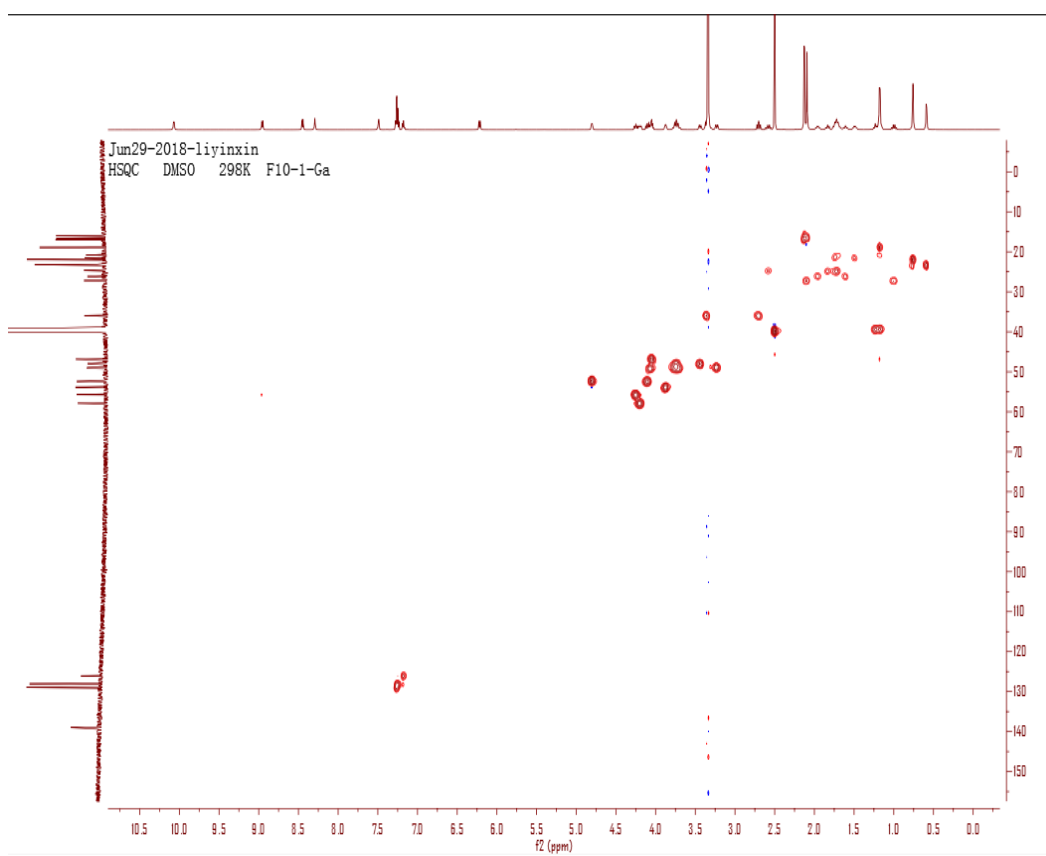

**Figure S58.** HSQC spectrum of Ga (III)-acremoneptide E (7) in DMSO- $d_6$ .



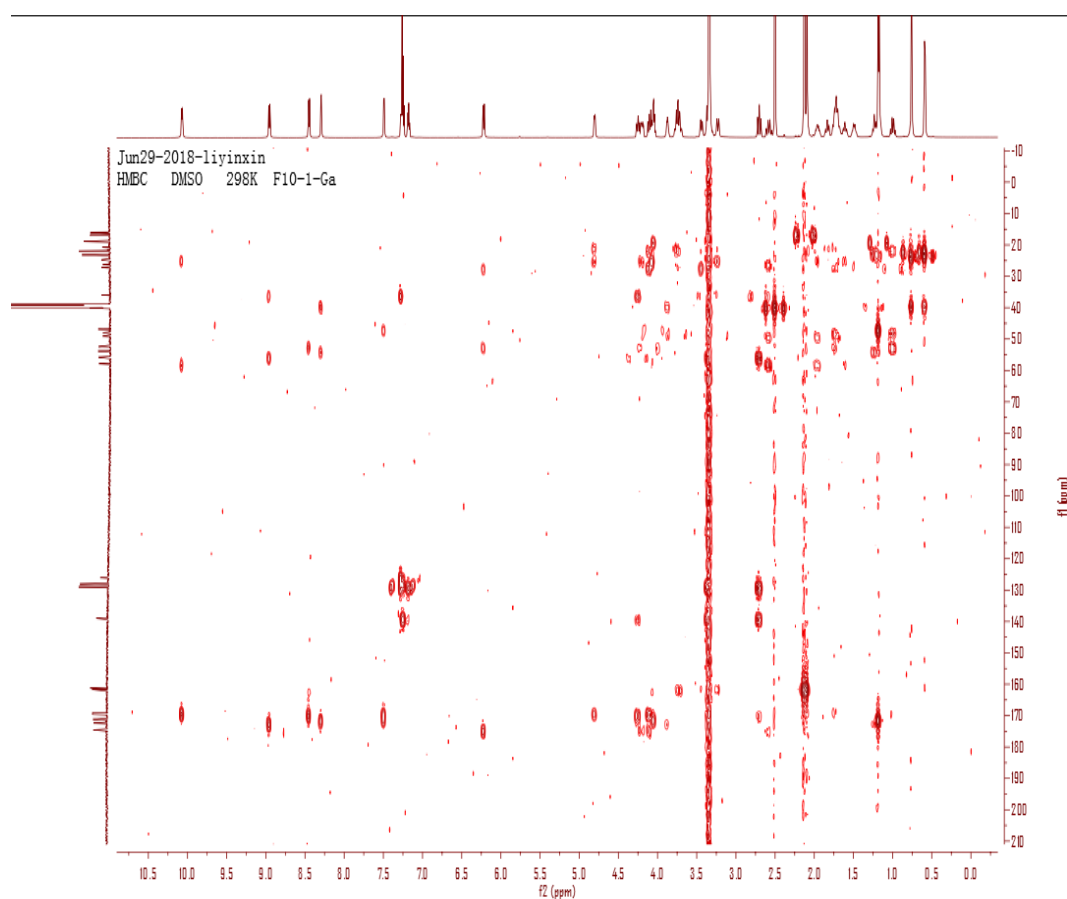

**Figure S59.** HMBC spectrum of Ga (III)-acremonpeptide E (7) in DMSO- $d_6$ .

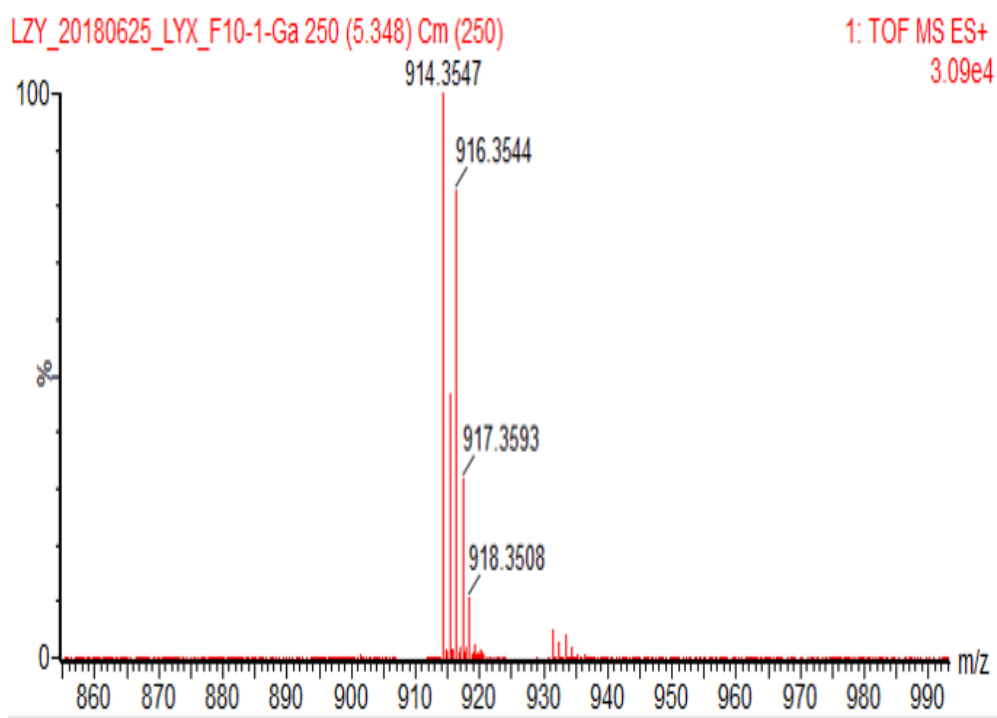

**Figure S60.** HRESIMS data of Ga (III)-acremonpeptide E (7).

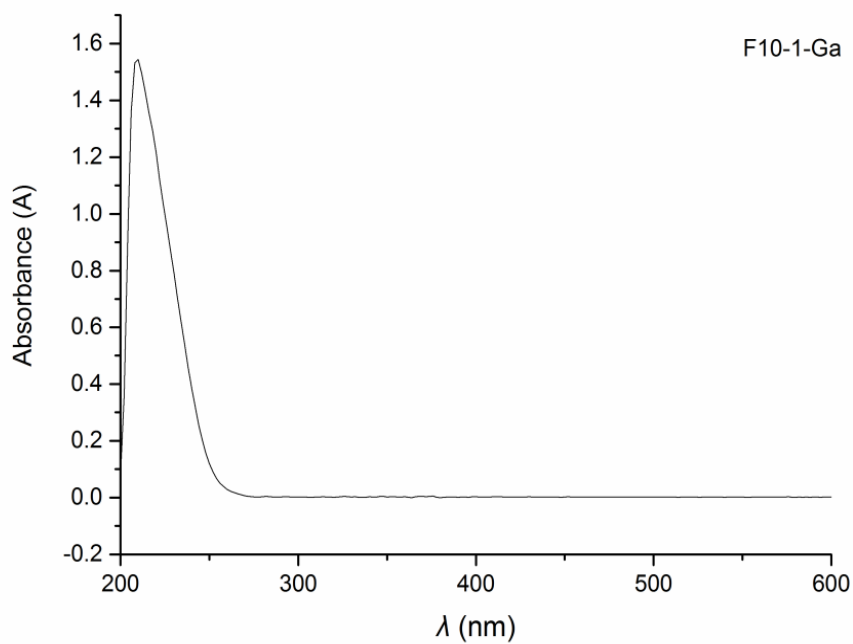

**Figure S61.** UV spectrum of Ga (III)-acremoneptide E (7) in MeOH.

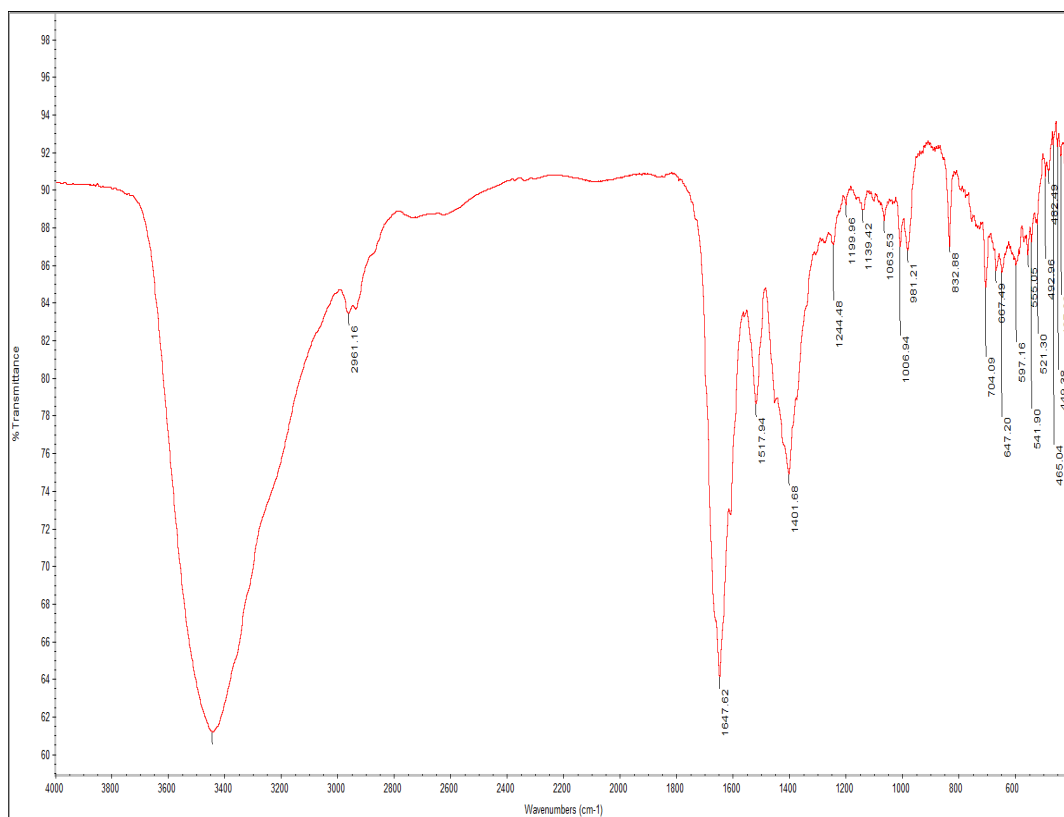

**Figure S62.** IR spectrum of Ga (III)-acremoneptide E (7).

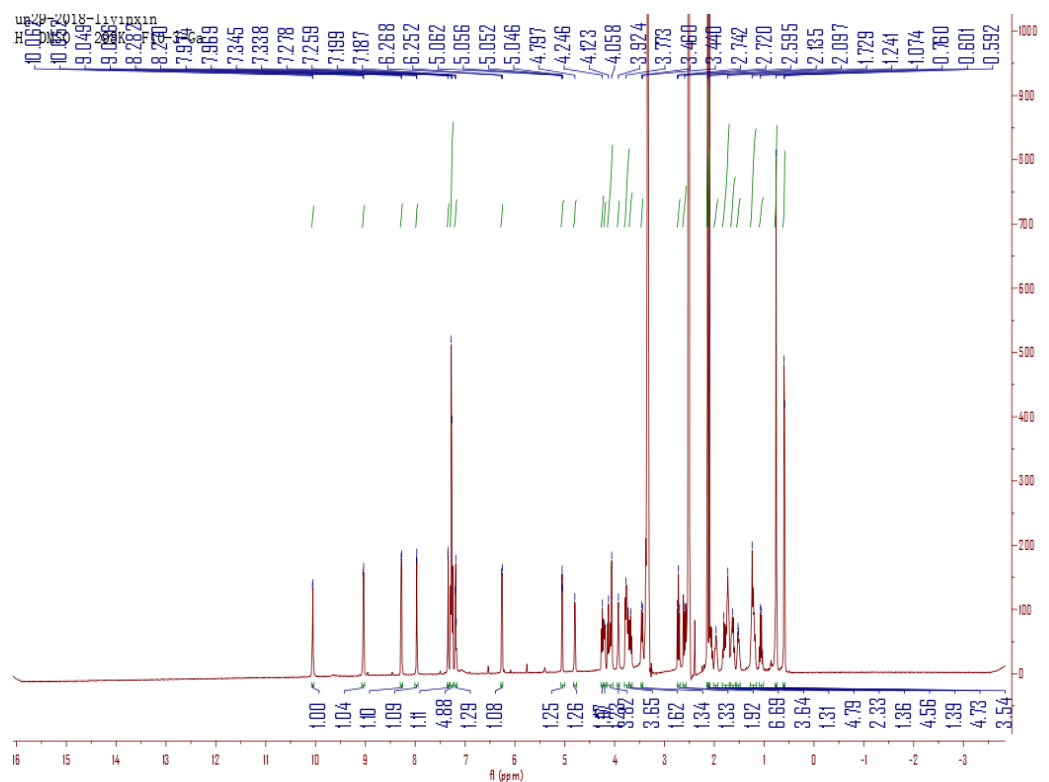

**Figure S63.**  $^1\text{H}$  spectrum of Ga (III)-acremoneptide F (**8**) in  $\text{DMSO}-d_6$  (600 MHz).

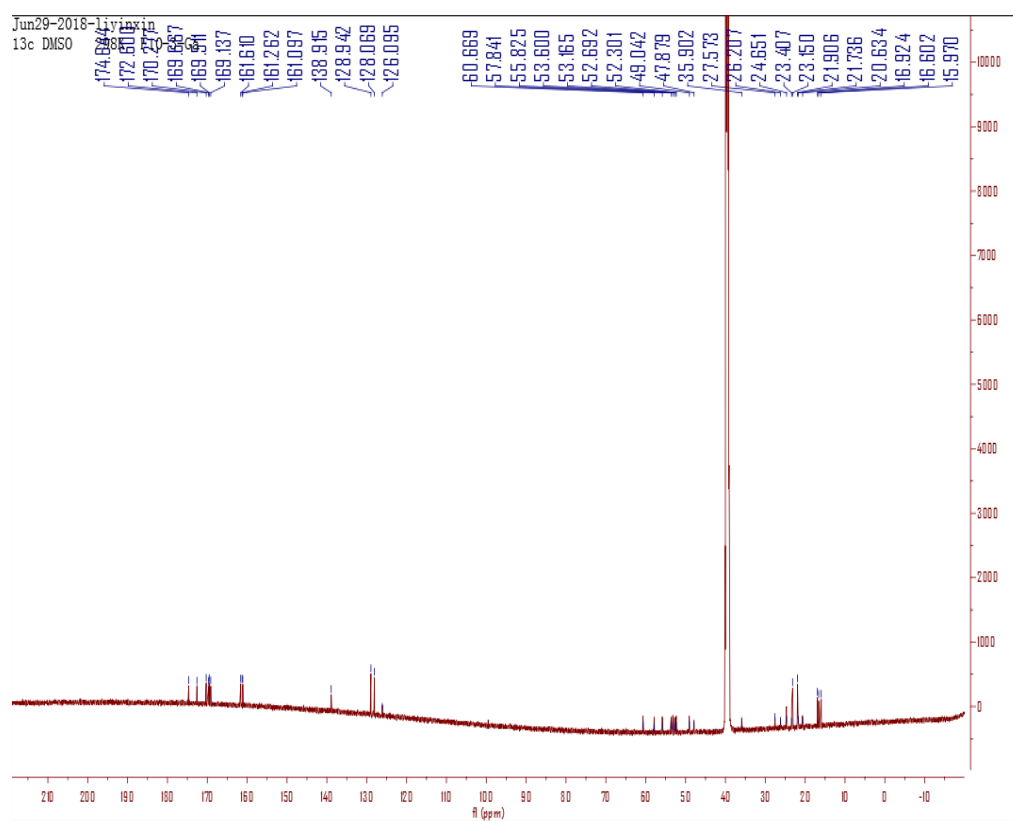

**Figure S64.**  $^{13}\text{C}$  spectrum of Ga (III)-acremoneptide F (**8**) in  $\text{DMSO}-d_6$  (150 MHz).

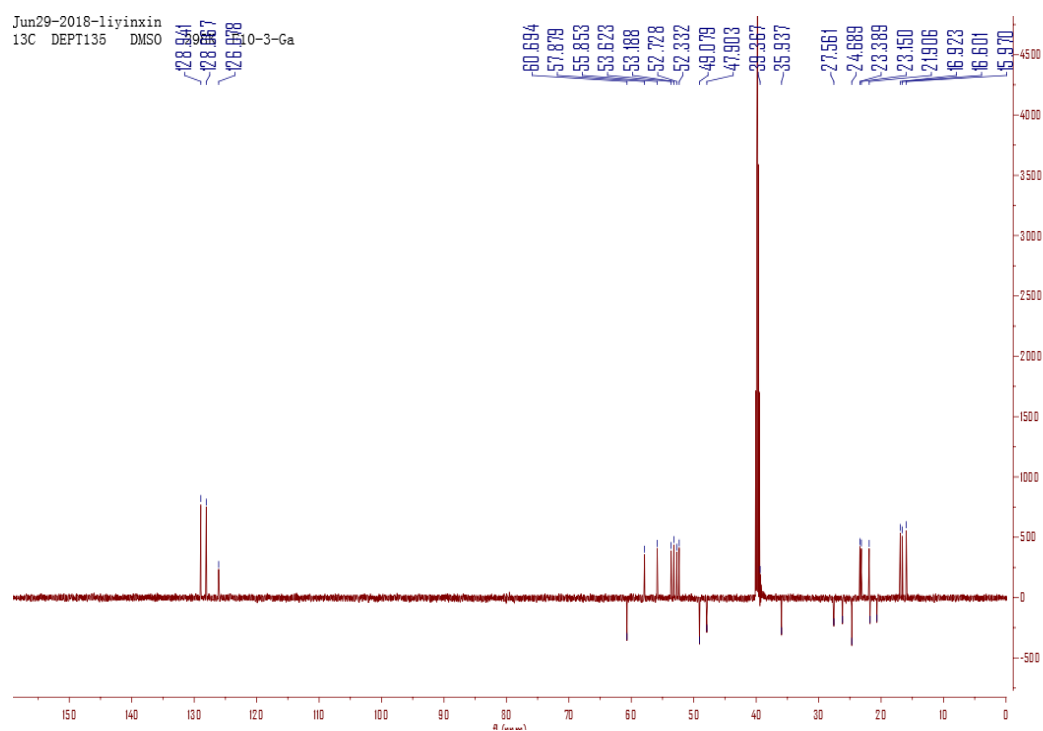

**Figure S65.** DEPT135 spectrum of Ga (III)-acremoneptide F (**8**) in DMSO- $d_6$  (150 MHz).

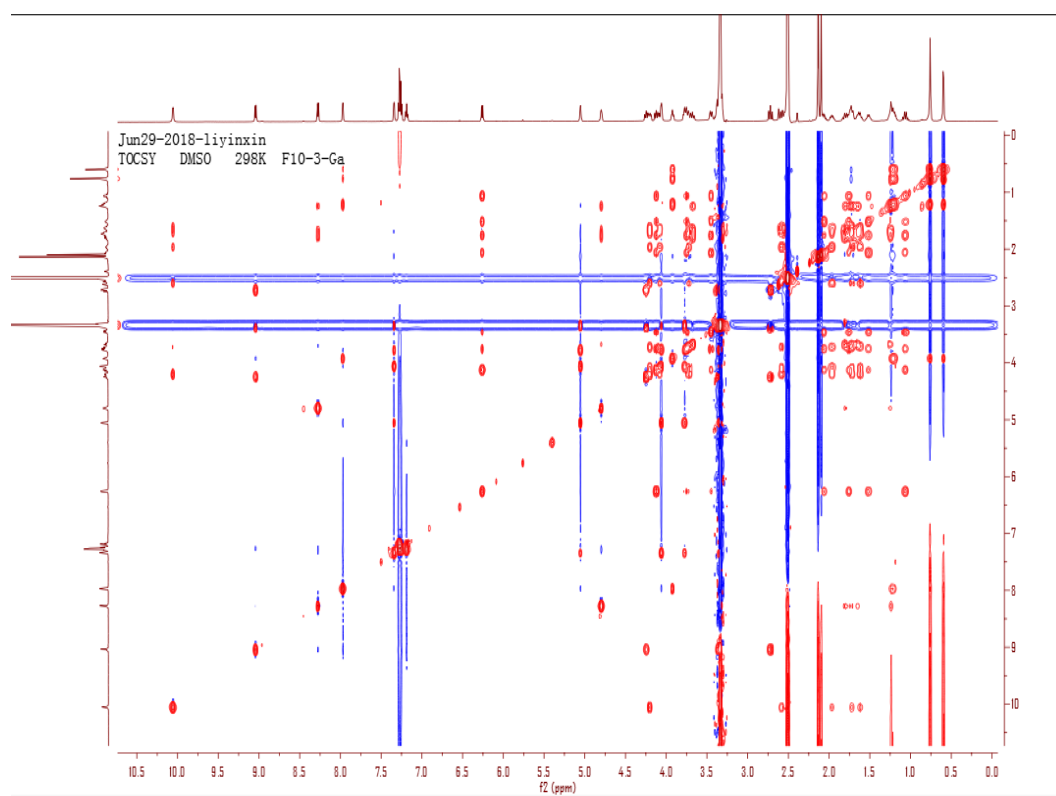

**Figure S66.** TOCSY spectrum of Ga (III)-acremoneptide F (**8**) in DMSO- $d_6$ .

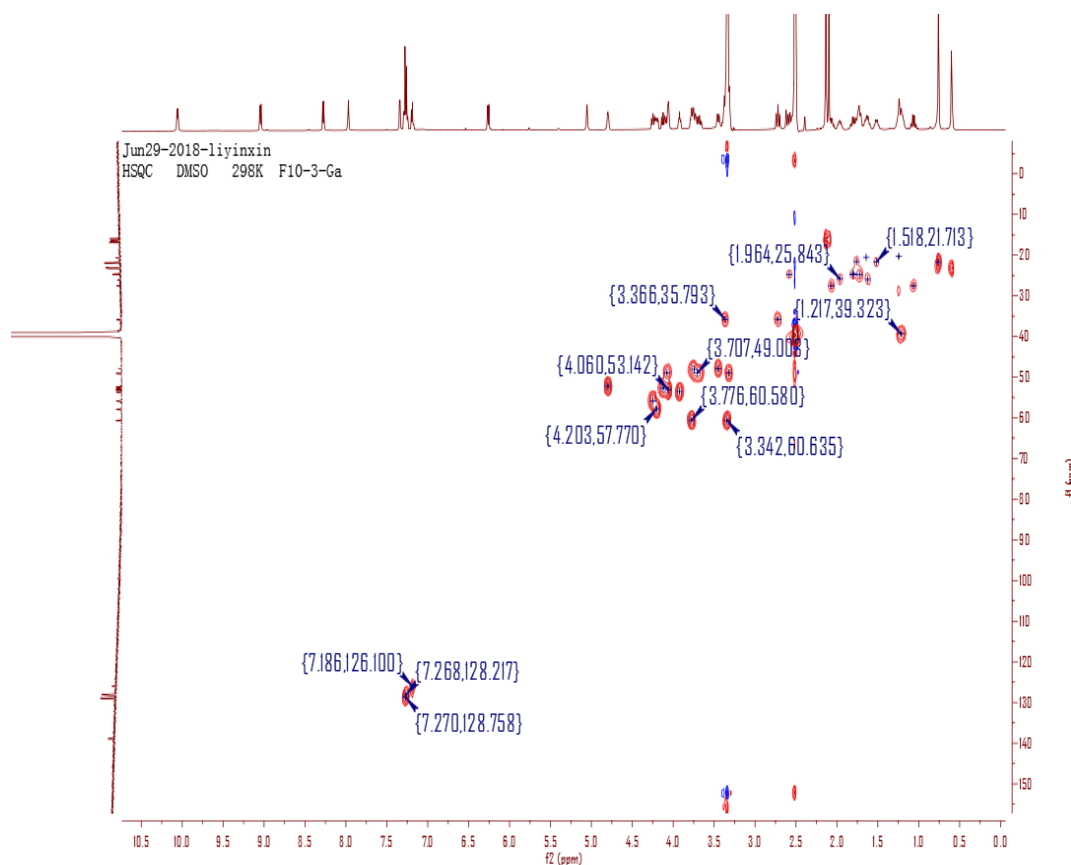

**Figure S67.** HSQC spectrum of Ga (III)-acremoneptide F (**8**) in DMSO- $d_6$ .

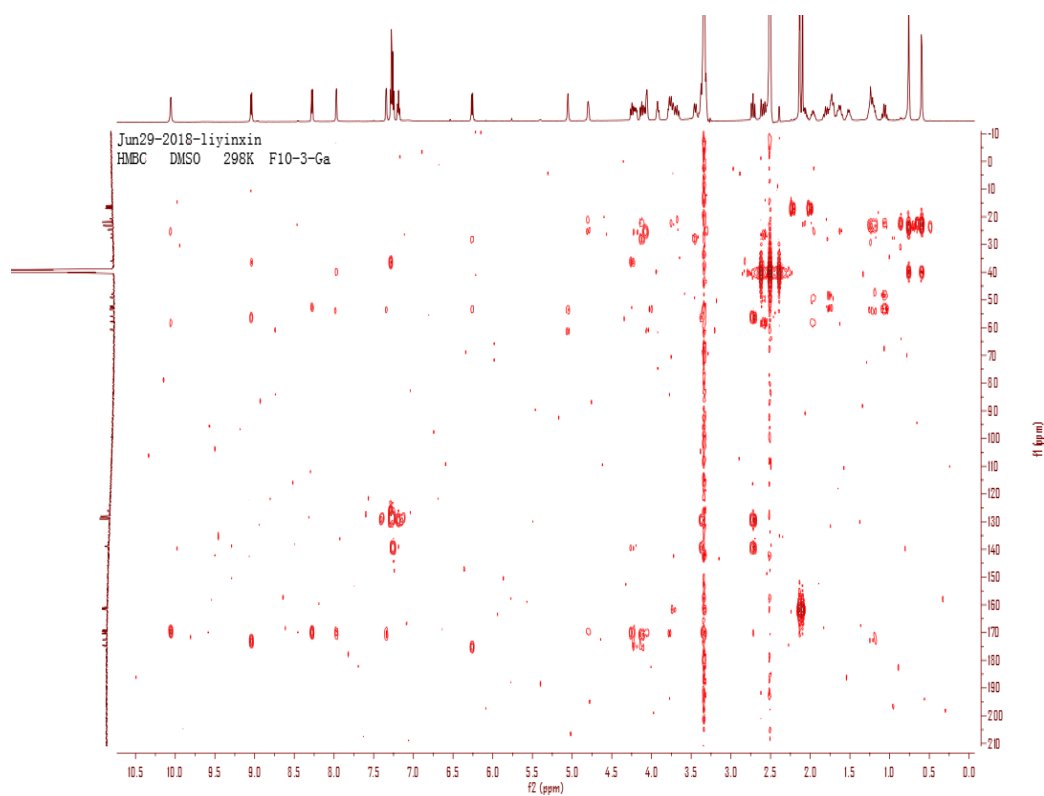

**Figure S68.** HMBC spectrum of Ga (III)-acremoneptide F (**8**) in DMSO- $d_6$ .

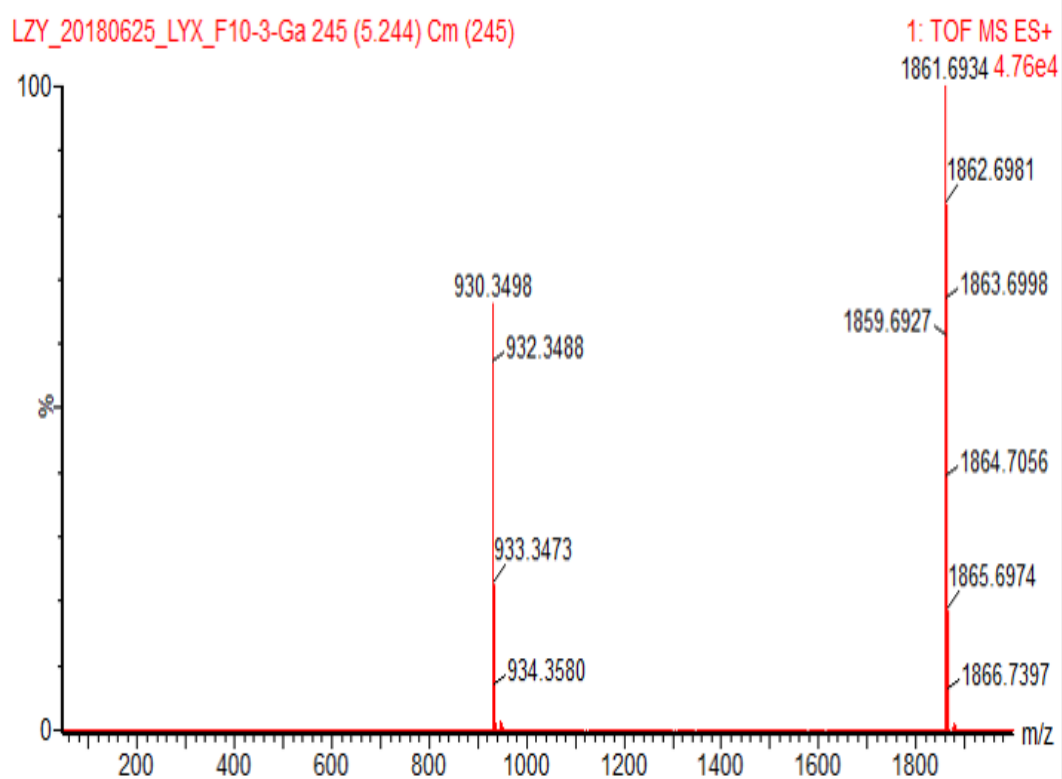

**Figure S69.** HRESIMS data of Ga (III)-acremoneptide F (**8**).

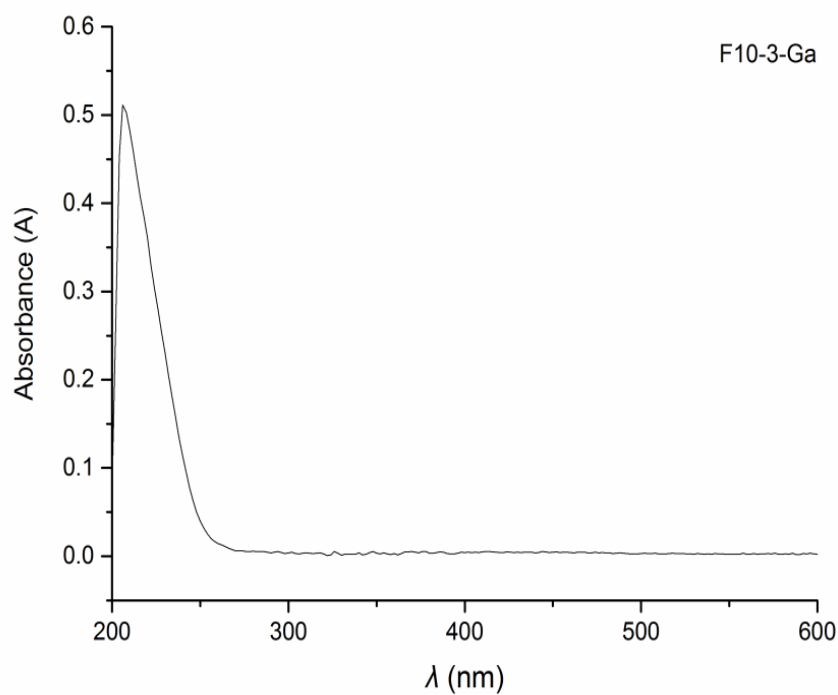

**Figure S70.** UV spectrum of Ga (III)-acremoneptide F (**8**) in MeOH.

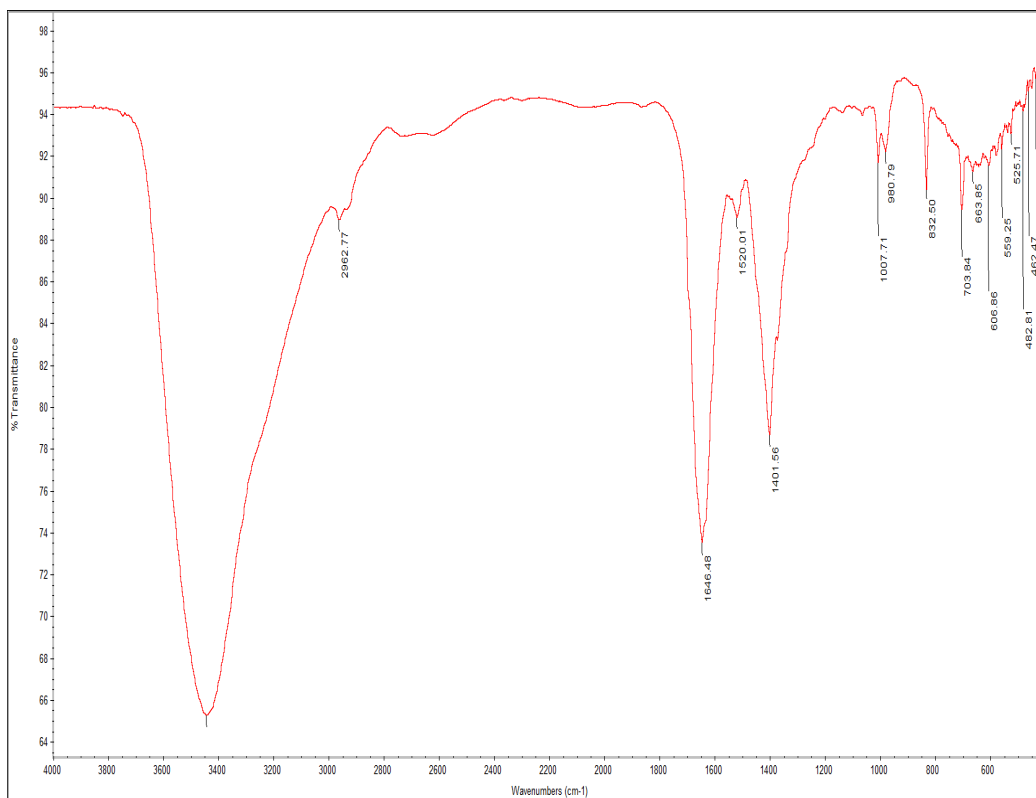

**Figure S71.** IR spectrum of Ga (III)-acremoneptide F (**8**).

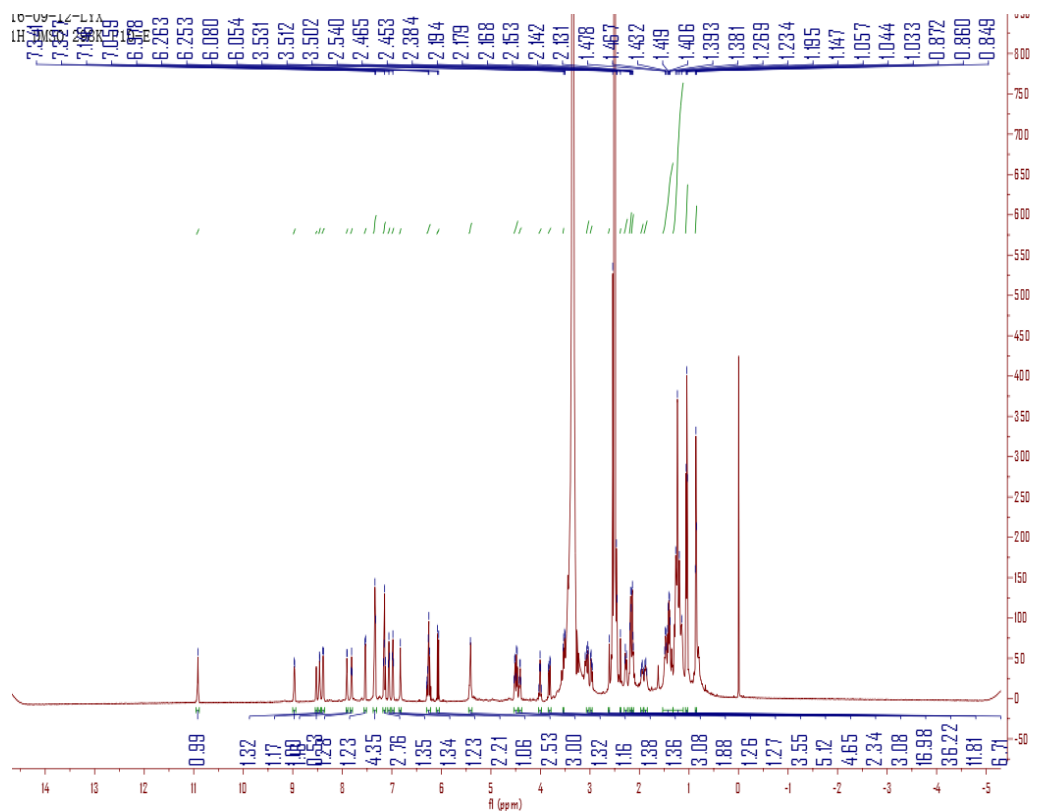

**Figure S72.**  $^1\text{H}$  spectrum of aselacin D (**9**) in  $\text{DMSO}-d_6$  (600 MHz).

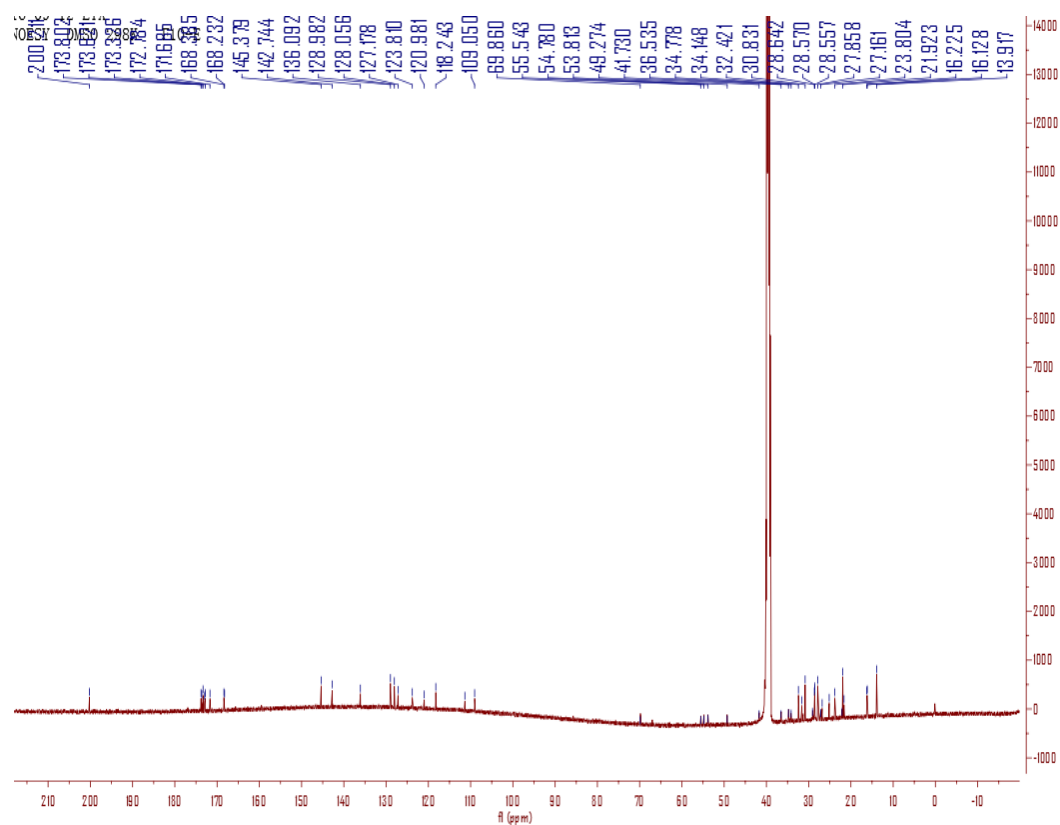

**Figure S73.** <sup>13</sup>C spectrum of aselacin D (9) in DMSO-*d*<sub>6</sub> (150 MHz).

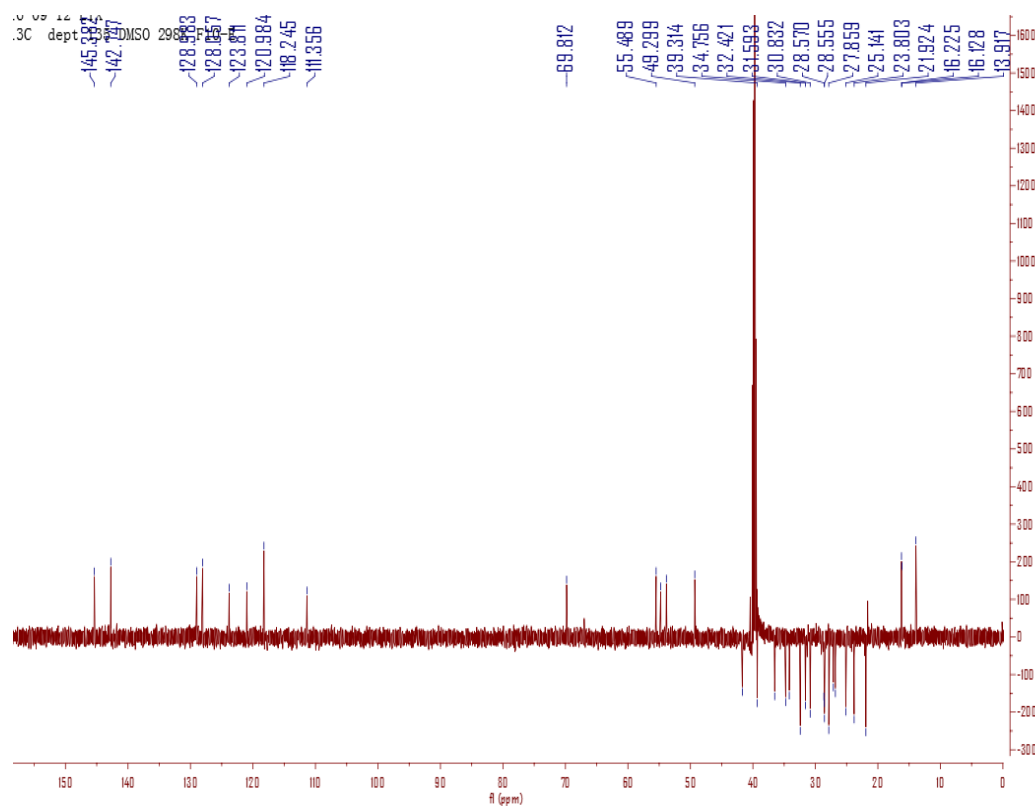

**Figure S74.** DEPT135 spectrum of aselacin D (9) in DMSO-*d*<sub>6</sub> (150 MHz).



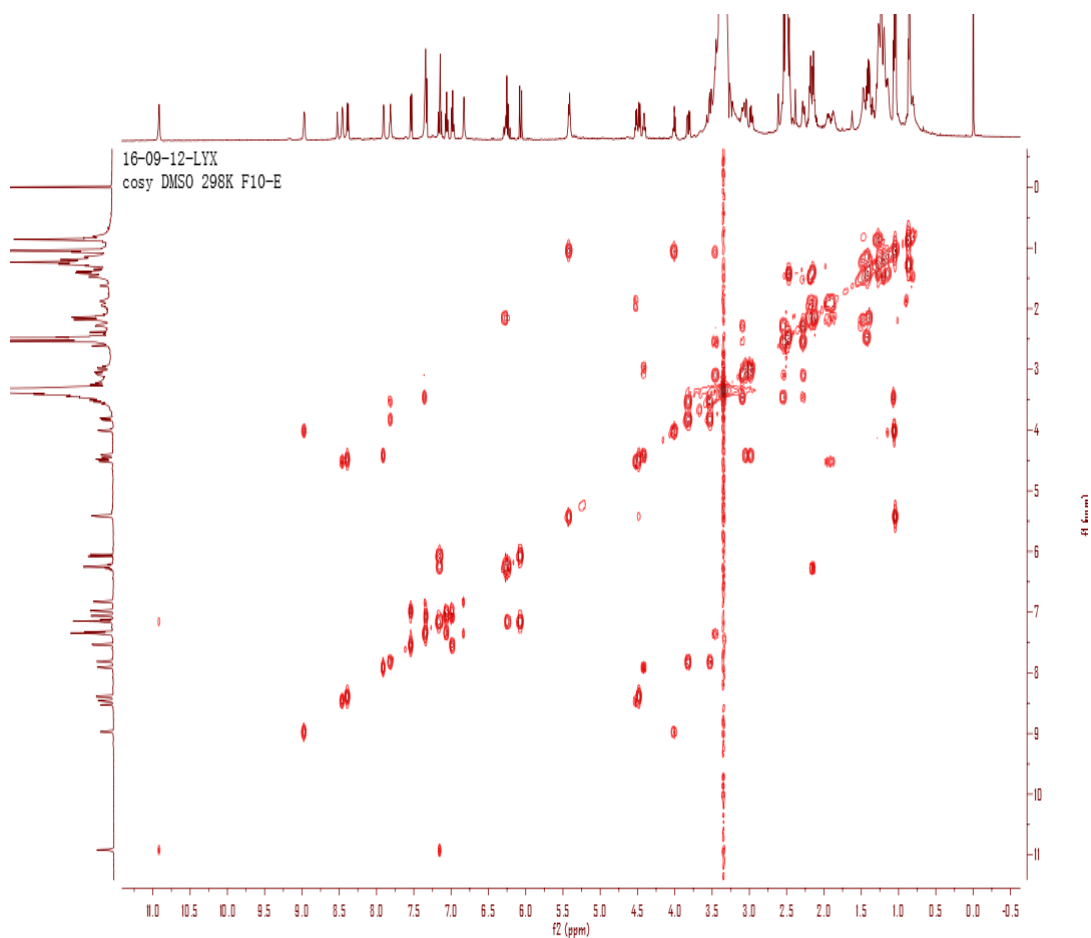

**Figure S75.** TOCSY spectrum of aselacin D (**9**) in DMSO- $d_6$

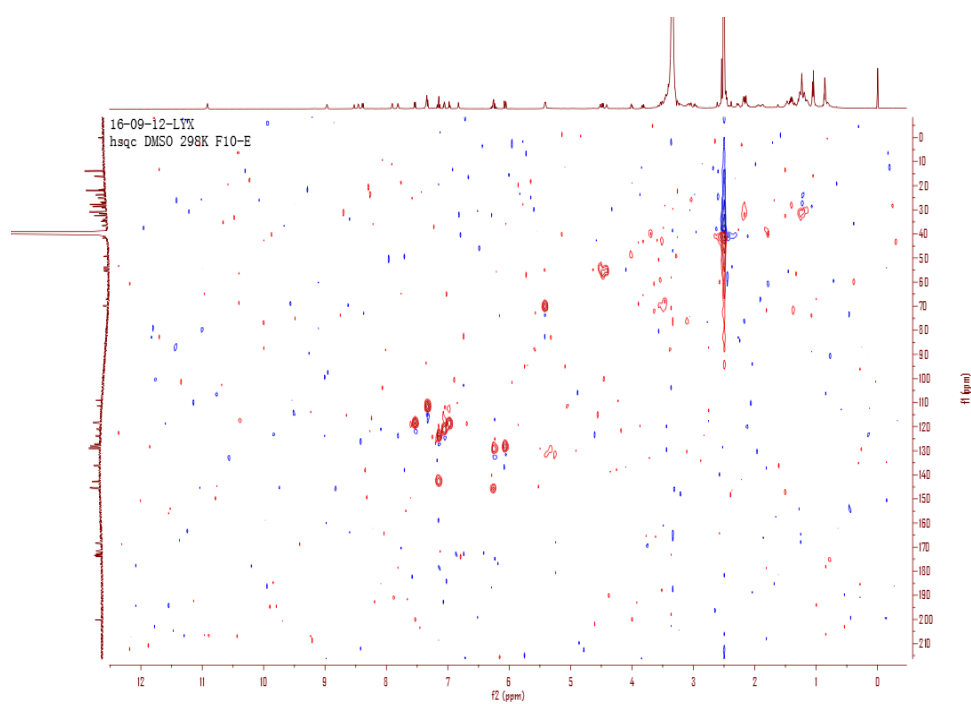

**Figure S76.** HSQC spectrum of aselacin D (**9**) in DMSO- $d_6$

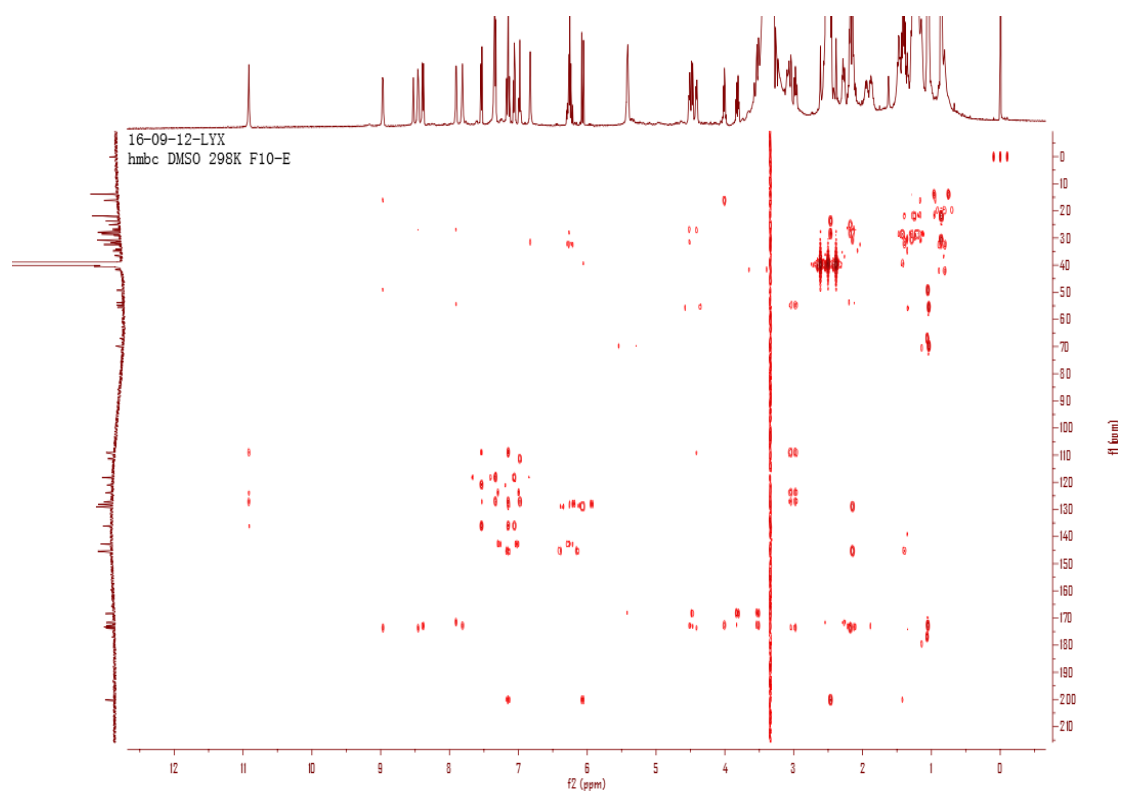

**Figure S77.** HMBC spectrum of aselacin D (**9**) in DMSO-*d*<sub>6</sub>

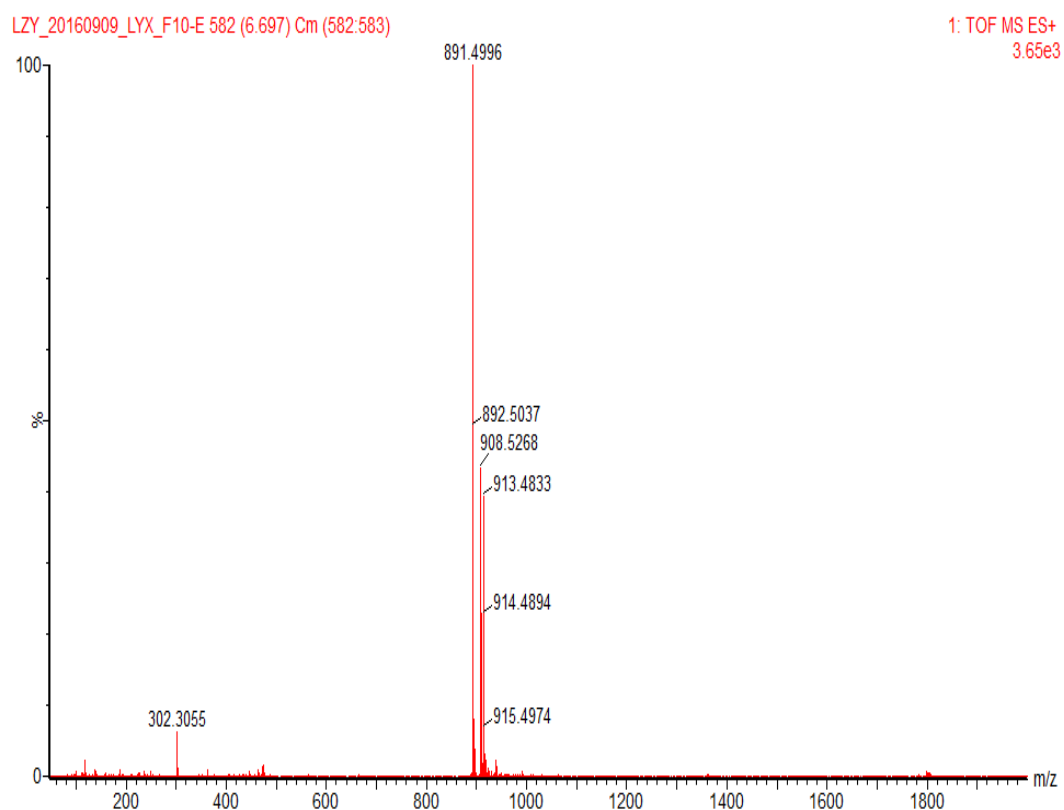

**Figure S78.** HRESIMS data of aselacin D (**9**)

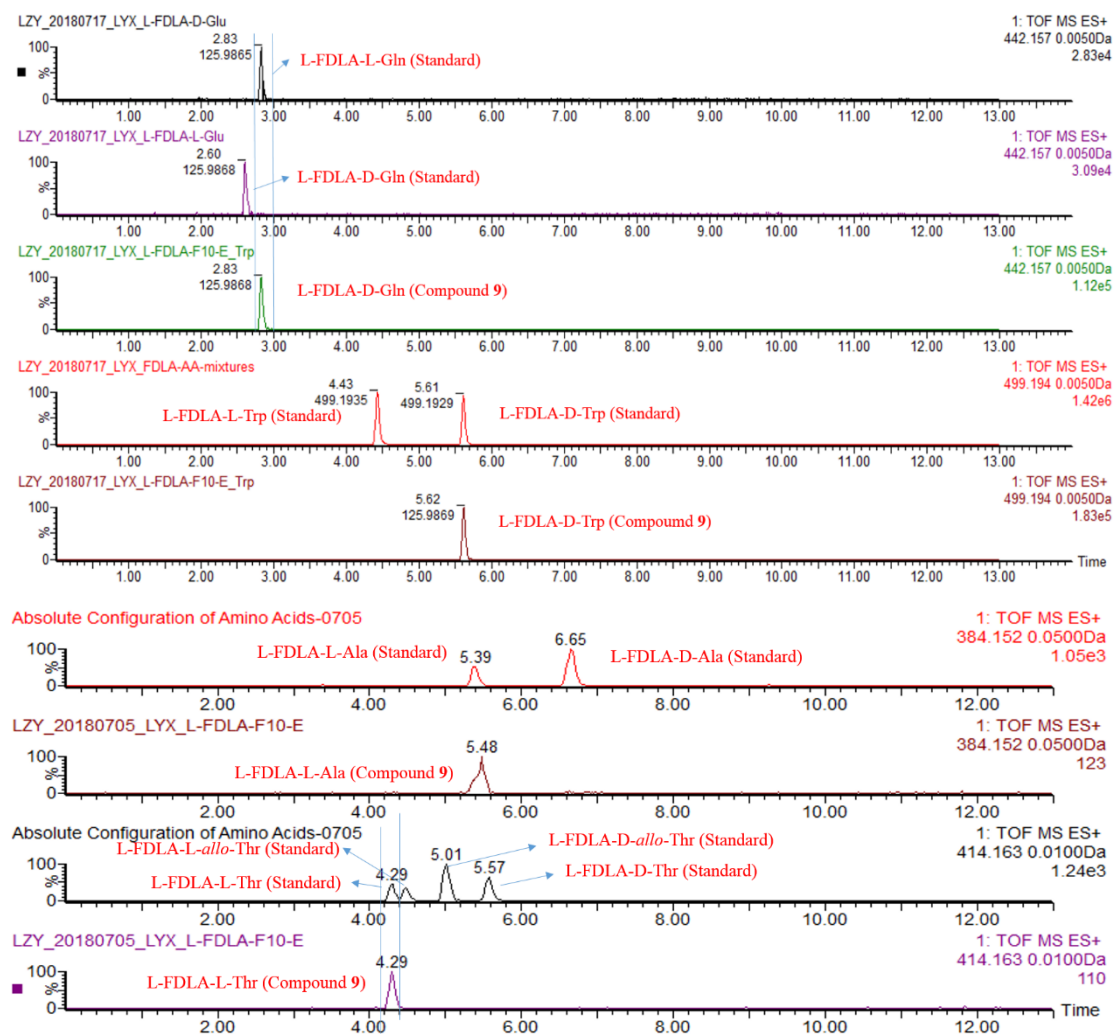

**Figure S79.** Mass chromatograms of the L-FDLA derivatives of standard amino acids and amino acids from aselacin D (9).

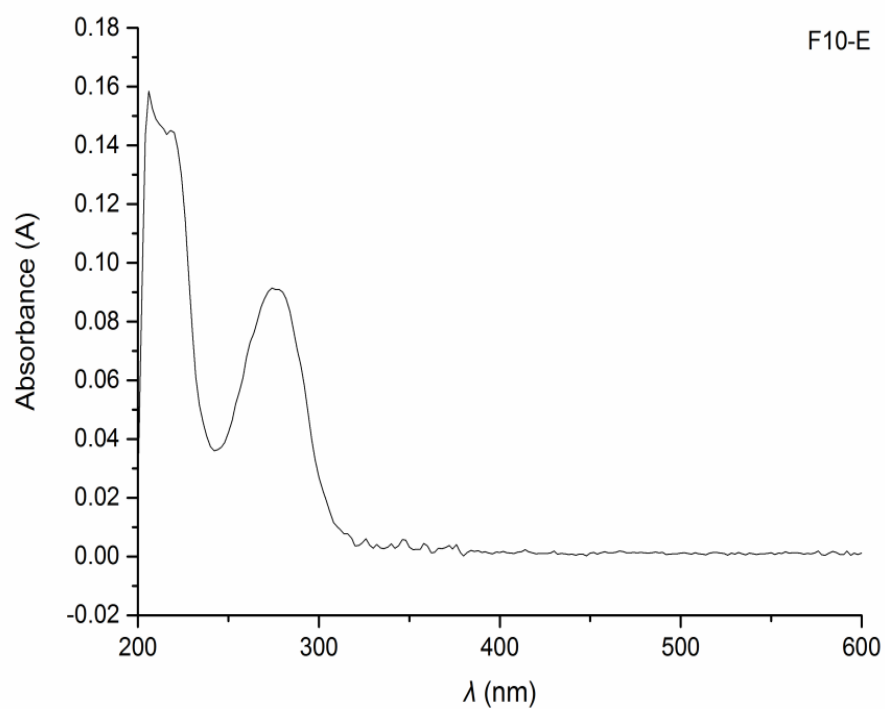

**Figure S80.** UV spectrum of aselacin D (**9**) in MeOH.

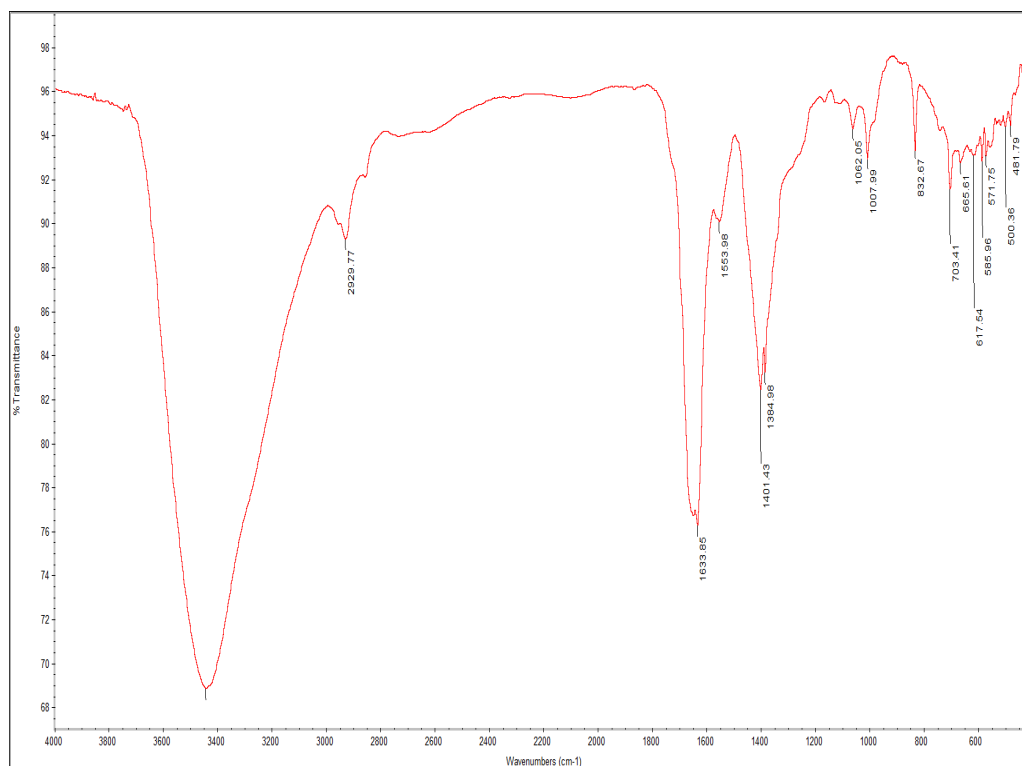

**Figure S81.** IR spectrum of aselacin D (**9**).
